# Supplementary material for: The association of statin use with reduced incidence of venous thromboembolism: a population-based cohort study
Source: PubMed Central journal article supplement — BMJ Open. 2014 Nov 5;4(11):e005862. doi: 10.1136/bmjopen-2014-005862 (PMC4225235; doi:10.1136/bmjopen-2014-005862), 2014-11-05
Supplement: bmjopen-2014-005862.draft_revisions.pdf [file bmjopen-2014-005862.draft_revisions.pdf]

# BMJ Open

## Statin use associates with a reduced incidence of venous thromboembolism – A population-based cohort study

|                                 |                                                                                                                                                                                                                                                                              |
|---------------------------------|------------------------------------------------------------------------------------------------------------------------------------------------------------------------------------------------------------------------------------------------------------------------------|
| Journal:                        | <i>BMJ Open</i>                                                                                                                                                                                                                                                              |
| Manuscript ID:                  | bmjopen-2014-005862                                                                                                                                                                                                                                                          |
| Article Type:                   | Research                                                                                                                                                                                                                                                                     |
| Date Submitted by the Author:   | 05-Jun-2014                                                                                                                                                                                                                                                                  |
| Complete List of Authors:       | Lassila, Riitta; Medical Faculty, University of Helsinki<br>Jula, Antti; The National Institute for Health and Welfare,<br>Pitkaniemi, Janne; University of Helsinki, Hjelt Institute, Public Health<br>Haukka, Jari; University of Helsinki, Hjelt Institute, Public Health |
| <b>Primary Subject Heading</b>: | Cardiovascular medicine                                                                                                                                                                                                                                                      |
| Secondary Subject Heading:      | Epidemiology                                                                                                                                                                                                                                                                 |
| Keywords:                       | Thromboembolism < CARDIOLOGY, EPIDEMIOLOGY, Anticoagulation < HAEMATOLOGY                                                                                                                                                                                                    |
|                                 |                                                                                                                                                                                                                                                                              |

SCHOLARONE™  
Manuscripts

Peer review only

# Statin use associates with a reduced incidence of venous thromboembolism – A population-based cohort study

---

<sup>1</sup>Riitta LassilaMD, PhD, <sup>2</sup>Antti Jula, MD, PhD, <sup>3</sup> JannePitkäniemi, PhD,  
and <sup>3</sup>Jari Haukka, MD, PhD

<sup>1</sup>Coagulation Disorders Unit, Department of Medicine, Division of Hematology and Laboratory Services HUSLAB and Clinical Chemistry, Helsinki University Central Hospital, Helsinki, Finland

<sup>2</sup>The National Institute for Health and Welfare (THL), Finland

<sup>3</sup>Hjelt Institute, University of Helsinki, Finland

**Corresponding author:**

Jari Haukka  
University of Helsinki, Hjelt Institute  
PO Box 40, FI-00014 University of Helsinki, Finland  
email: [jari.haukka@helsinki.fi](mailto:jari.haukka@helsinki.fi)  
tel.: +358 50 4155314  
fax.: +358 09 191 27518

**Keywords:** venous thromboembolism, epidemiology, statins, cohort study

**Word count:** 2978

## Abstract

**Objectives:** Venous thromboembolism (VTE) continues to be a frequent, medical emergency demanding condition to reach the diagnosis and initiate anticoagulation therapy. The use of statins is reported, in addition to reducing the incidence of arterial thrombosis, also to decrease both the incidence and reoccurrence of VTE. The aim of our study is to explore the association between statin usage and the incidence of new VTE at the population level during a 10-year follow-up.

**Design:** Population based historic cohort

**Setting:** The Health 2000 survey was based on a nationally representative sample.

**Participants:** 8028 individuals aged 30 years or over in Finland.

**Primary and secondary outcome measures:** The primary end-point event was the first ever hospitalization due to one of the following causes: pulmonary embolism (ICD10 I26), cerebral venous nonpyogenic thrombosis (I63.6), phlebitis and thrombophlebitis of superficial vessels of lower extremities (I80.0-180.9).

**Results:** The preselected explanatory variables applied to Poisson regression model were statin usage (no/yes) during follow-up (2000-2011) and several baseline data (age, sex ; usage of blood glucose lowering drug, vitamin K antagonists, and anti-platelet agents). We observed 136 VTE events, the incidence of 1.72 (95% CI 1.44-2.04) per 1000 person-years. Current statin usage did not associate with the incidence of VTE according to the univariate model (RR 0.93, 0.56-1.52), but when adjusted with baseline variables (age, sex, medications) the RR declined to 0.60 (0.36-1.00,  $p=0.04$ ).

**Conclusions:** Statin use offers protection against first ever VTE event and appears as a primary prevention tool in patients without anticoagulation or anti-platelet medication.

### Strengths of this study

- population based, no selection bias in start of follow-up
- long and complete follow-up information

### Limitations of this study

- limited number of background variables
- the comprehensive use of prescribed drugs in this study, could not be verified with certainty

### Introduction

Venous thromboembolism (VTE) continues to be a frequent condition which demands medical emergency attention to reach the diagnosis and initiate anticoagulation therapy. The mortality during a few months after VTE varies between 5-20%, and the patients often have other co-morbidities, such as cardiovascular disease and cancer. The yearly incidence of VTE is 1-2/1000 inhabitants in western societies. Nowadays, the traditional heparin and vitamin K antagonist (VKA) therapy followed with the course of temporal (3-6 months) or permanent VKA can be opted with novel oral anticoagulants[1].

The decision of either continuing the anticoagulation for a few months or permanently depends on the acquired or inherited risk factor profile of the patient. This includes age above 60 years and concomitant illness, including cancer and inflammatory diseases as well as obesity, hormonal remedies and family history or severe thrombophilias (such as homozygosity of factor V Leiden or prothrombin mutation, double defects, antiphospholipid antibody syndrome), subjecting the

1  
2  
3  
4  
5  
6  
7 patient to recurrent VTE. Despite the clinical evaluation the recurrence rate of VTE continues to  
8  
9 be 15-20% after an idiopathic event and around 5% after a provoked thrombosis[1]. Bleeding  
10  
11 tendency needs to be regularly weighted also against the risk of thrombosis recurrence, while  
12  
13 maintaining the anticoagulation.

14  
15  
16 The use of statins has been reported to reduce the incidence of not only the arterial thrombosis,  
17  
18 but also interesting data on the decline of both the incidence and reoccurrence of VTE have  
19  
20 emerged. Retrospective observational and case-control studies as well as experimental evidence  
21  
22 refer to the possibility that statins exert an antithrombotic effect also in the venous system. A  
23  
24 recent meta-analysis reported the association of VTE and a 20-36% protection with statin use [2].  
25  
26 A primary prevention trial of VTE with rosuvastatin in a randomized placebo-controlled design  
27  
28 showed a 48% reduction in the incidence of VTE[3]. Moreover, statin treatment alleviated the risk  
29  
30 of recurrent pulmonary embolism by 50% whether the patient used long-term vitamin K  
31  
32 antagonist treatment or had stopped anticoagulation, as reported by a Dutch population-based  
33  
34 study with initially hospitalized patients[4]. Finally, statins decrease the occurrence of venous  
35  
36 thromboembolism even in patients with cancer[5].

37  
38  
39 Statins reduce the procoagulant activity of platelet membranes and downplay the signaling via LDL  
40  
41 receptors, which are engaged with the platelet activation[6]. Statins also enhance fibrinolysis by  
42  
43 reducing the plasminogen activator inhibitor-1 and triglyceride concentration. Also, other  
44  
45 pleiotropic and anti-inflammatory mechanisms, including dampened tissue factor expression by  
46  
47 monocytes, have been described which can attenuate the risk of thrombosis.

48  
49  
50  
51 The aim of the study is to explore the association between statin usage and incidence of the first  
52  
53 ever VTE in Finland. Our study utilizes a nationally representative sample of 8028 persons aged  
54  
55  
56  
57  
58  
59  
60

1  
2  
3  
4  
5  
6  
7 >30 years [7] of The Health 2000 Survey and a prospective observational pharmaco-  
8  
9 epidemiological design.

## 10 11 12 **Material and methods**

### 13 14 15 **Study population**

16  
17  
18 The Health 2000 survey was based on a nationally representative sample of 8028  
19  
20 individuals aged 30 years or over in Finland. To ensure that sample is representative of the  
21  
22 Finnish population, a two-stage stratified cluster sampling procedure was used. The baseline  
23  
24 data collection from study subjects took place between September 2000 and June 2001, and  
25  
26 consisted of an interview and a comprehensive health examination. Of the study sample 6986  
27  
28 subjects (87 %) were interviewed at their home or in an institution, 6354 subjects (79 %)  
29  
30 took part in a comprehensive health examination and 416 subjects (5%) were examined at  
31  
32 their home. The Health 2000 study was approved by the Ethics Committees of the National  
33  
34 Public Health Institute (since 2009 the National Institute for Health and Welfare) and the  
35  
36 Hospital District of Helsinki and Uusimaa, and the participants gave written informed  
37  
38 consent[7].

### 39 40 **Follow-up time and end-points**

41  
42  
43 The primary end-point event of this study was the first hospitalization due one of the  
44  
45 following causes: pulmonary embolism (ICD10 I26), cerebral infarction due to cerebral  
46  
47 venous nonpyogenic thrombosis (I63.6), phlebitis and thrombophlebitis of superficial vessels  
48  
49 of lower extremities (I80.0-180.9). The information about end-points was obtained from  
50  
51 National Hospital Discharge Register that covers all hospitalizations in Finland starting from  
52  
53 1969. The 10-year follow-up was started at the beginning of Health 2000 Study and was  
54  
55  
56  
57  
58  
59  
60

1  
2  
3  
4  
5  
6  
7 stopped at death, end of year 2011, or end-point, whichever occurred first. The data about  
8  
9 deaths were obtained from the Statistics Finland. There were 103 individuals with recorder  
10  
11 primary end-point before the start of follow-up compatible with the general prevalence of the  
12  
13 disease, and these subjects were excluded from the study population. Thus, the size of study  
14  
15 population in the start of follow-up was 7925.

### 16 17 **Laboratory measurements**

18  
19 Venous blood samples were drawn from the antecubital vein after a minimum of 4 h fasting.  
20  
21 HDL cholesterol, total cholesterol, triglyceride and plasma glucose concentrations were  
22  
23 determined enzymatically (Roche Diagnostics, GmbH, Mannheim, Germany for HDL; Olympus  
24  
25 System Reagent, Hamburg, Germany for total cholesterol, triglycerides and glucose) with a  
26  
27 clinical chemistry analyser (Olympus, AU400, Hamburg, Germany)[8]. C-reactive protein  
28  
29 (CRP) concentrations were determined by a chemiluminescent immunometric assay  
30  
31 (Immulite, Diagnostic Products, Los Angeles, CA)[8]. LDL cholesterol was calculated with the  
32  
33 Friedewald formula. Plasma insulin and homocysteine concentrations were determined with  
34  
35 microparticle enzyme immunoassay (Abbott Laboratories, Dainabot, Tokyo, Japan)[9,10]. S-  
36  
37 25(OH)D concentrations were measured by radioimmunoassay (Incstar, Stillwater, MN,  
38  
39 USA)[11].

### 40 41 42 **Drug information**

43  
44 The data about the prescribed and purchased drugs were obtained from registers of the Social  
45  
46 Insurance Institution. We had records of the following drugs classified by Anatomical  
47  
48 Therapeutic Chemical (ATC) code[12]: statins (C10AA), blood glucose lowering drugs,  
49  
50 excluding insulins (A10B), insulin (A10A), VKA (B01AA), and antiplatelet agents, excluding  
51  
52 heparin (B01AC) and over the counter acetylsalicylic acid. Regarding statins the data included  
53  
54 all prescribed statins purchased during the follow-up period in 2000 – 2006 and 2008.  
55  
56  
57  
58  
59  
60

1  
2  
3  
4  
5  
6  
7 Because there were no data available regarding the drug amounts purchased for years 2007,  
8 and 2009-2011, we calculated the mean amount of purchase based on available years and  
9 adapted it for the whole follow-up period. Time dependent variable for the current statin  
10 usage was determined for each individual with the prescription data using R language  
11 package Epi[13]. The follow-up time of each individual with statin exposure was cut into 6-  
12 month periods and the statin usage in each period was determined. For other drugs we had  
13 only the number of prescriptions at the baseline year 2000, which was used to construct a  
14 dichotomic variable of drug usage at baseline (no/yes).  
15  
16  
17  
18  
19  
20  
21  
22  
23  
24  
25  
26

### 27 **Statistical modeling**

28  
29 We applied the Poisson regression model using end-point event as a dependent variable,  
30 length of the follow-up as an offset variable, and statin usage (no/yes) during each time  
31 period as time-varying explanatory variable. The following variables were used as time-  
32 invariant variables measured at baseline: age (30-40, 40-50, 50-60, 60-70, over 70), sex  
33 (male/female), blood glucose lowering drug usage, excluding insulins (no/yes), insulin usage  
34 (no/yes), vitamin K antagonists usage (no/yes), antiplatelet agents (no/yes), blood glucose  
35 (mmol/L), total cholesterol (mmol/L), HDL cholesterol (mmol/L), LDL cholesterol (mmol/L),  
36 triglycerides (mmol/L), CRP (mg/L), vitamin D3 (nmol/L), homocysteine ( $\mu\text{mol/L}$ ), and  
37 insulin (mU/L). The values of the laboratory measurements were transformed to categorical  
38 variables defined by tertiles. We also estimated the inverse probability weights (IPW) to fit  
39 marginal structural models[14]. IPW were estimated using age and sex in the numerator, and  
40 age, sex, blood glucose lowering drugs other than insulin usage, VKA usage, and use of  
41 antiplatelet agent in the denominator.  
42  
43  
44  
45  
46  
47  
48  
49  
50  
51  
52  
53  
54  
55  
56  
57  
58  
59  
60



## Results

The size of the study population was 7925, including 3589 males and 4336 females (Table 1).

We observed 136 VTE events during the follow-up with the incidence of 1.72 (95% CI 1.44-2.04) per 1000 person-years during the mean follow-up time 10 years (Table 2). There were 64 events with the diagnosis pulmonary embolism (ICD-10 I26), one with sinus thrombosis (I636) and 71 with deep vein thrombosis (I80.0-180.9).

All together there were 67,532 statin prescriptions, and 2083 individuals (26% of population) had at least one prescription. Simvastatin (ATC code C10AA01) with 54% of prescriptions and atorvastatin (C10AA05) with 23% represented the most frequent active lipid-lowering substances. Current statin usage that comprised 14% of all cumulated person-years, did not associate with the incidence of VTE according to the univariate model Rate Ratio (RR) 0.93 (0.56-1.52)(Table 2). The use of oral antidiabetic drugs at the baseline was associated with a three-fold increased incidence (RR 3.32, 1.84-6.00), but insulin usage did not show any association. Using any antithrombotic drugs associated with higher incidence (RR 4.55, 2.70-7.66).

Addition of more explanatory variables in the model substantially altered the association between the statin usage and incidence (Table 3). Adjusting for sex, age, baseline oral antidiabetic, insulin, and use of antithrombotics (Model II) reduced the RR to 0.60 (0.36-1.00). Using IPW for the structural model (Model III) decreased the RR further to 0.58 (0.35-0.96). Adjusting for the baseline laboratory measurements also decreased slightly the estimate for statin effect, e.g. adjusting for CRP gave RR 0.43 (0.23- 0.81). However, because of the missing laboratory measurements we do not report these results in further detail, e.g. for CRP there

1  
2  
3  
4  
5  
6  
7 were several (1694) missing values.(Table 2). Increased levels of LDL associated with an  
8  
9 increasing incidence of VTE, the same occurred with homocysteine.

10  
11  
12 In addition, we looked for the possible interactions between statin usage and age, sex, blood  
13  
14 glucose lowering drugs usage (excluding use of insulin), VKA and platelet aggregation  
15  
16 inhibitors. Interaction for sex and statin usage was significant ( $\chi^2=6.310$ ,  $df=1$ ,  $p=0.012$ ).  
17

18 Interestingly, it turned out that the incidence of VTE among the statin group for males was  
19  
20 quite low (RR 0.22, 0.06-0.65), but for females such an association was not obvious (RR 0.75,  
21  
22 0.41-1.38), upon comparing the statin usage without its usage (Table 4.).  
23  
24

## 25 26 Discussion

27  
28 To our knowledge, this is the first report studying association between statin usage and VTE  
29  
30 that utilizes a nationally representative population sample. Our results during the 11 years of  
31  
32 prospective follow-up on the incidence of VTE are in line with the recent meta-analysis[15],  
33  
34 which showed the risk reduction of 0.89 (0.78-1.01) for VTE among statin users. The  
35  
36 JUPITER study, the largest meta-analysis of trials, including 465 events, showed 36%  
37  
38 reduction in VTE (RR 0.64, 0.39-1.06,  $p=0.08$ )[16]. Our study addressed the new incidence of  
39  
40 VTE, as the patients who previously had suffered from VTE (136/8028) were excluded from  
41  
42 study population. The prospective nature and large population-based design of pharmaco-  
43  
44 epidemiology are the strengths of our study.  
45

46  
47 In this freely living Finnish population sample we could demonstrate that statin use is  
48  
49 associated with a reduction of the incidence of VTE, including both deep vein thrombosis of  
50  
51 the lower extremities, pulmonary embolism and one case of cerebrovascular sinus  
52  
53 thrombosis. This adds to the confirmation that statins exert anticoagulant activity[2-5].  
54  
55  
56  
57  
58  
59  
60

1  
2  
3  
4  
5  
6  
7 Furthermore, it supports the idea that statin therapy could be implemented to the patients  
8  
9 with the risk of VTE.

10  
11  
12 We observed that use of oral antidiabetic drugs at the baseline was associated with a three-  
13  
14 fold increased incidence (RR 3.32, 1.84-6.00), which refers to that insulin-resistant patients  
15  
16 carry a high risk of VTE, and the oral antidiabetic drugs do not seem to alleviate this risk,  
17  
18 while insulin may do so[17]. The positive association between antithrombotic drugs and VTE  
19  
20 is quite probably due to confounding by indication[18], and also the co-occurrence of  
21  
22 cardiovascular disease and VTE has been noted in several studies[19]. The limitation of our  
23  
24 study relies on the fact that over-the counter aspirin use is not controlled. This is significant,  
25  
26 as aspirin has been recently shown to inhibit the reoccurrence of idiopathic VTE[20].  
27  
28

29  
30 Men seemed to respond to statin use more favourably than females, indicating a plausible  
31  
32 hormonal regulation of the effect of statins. In women we did not control for hormonal  
33  
34 replacement therapy, which may be a confounding remedy, known to be a risk factor for  
35  
36 VTE[21,22] The well-known age-association in increasing the incidence of DVT and PE was  
37  
38 evidenced also among our patients. Also, the overall incidence of VTE in Finland is compatible  
39  
40 with what has been reported internationally. The protective association with incidence of VTE  
41  
42 among highest third tertile of HDL-LDL ratio, lowest homocysteine and CRP support earlier  
43  
44 results of these surrogate laboratory markers.  
45  
46

47  
48 Several limitations must be kept in mind when evaluating results from any observational  
49  
50 study based on record linkage of drug information. Firstly, the comprehensive use of  
51  
52 prescribed drugs in this study, could not be verified with certainty, and may be subject to  
53  
54 misclassification. The prescription data do not contain information on drugs used in nursing  
55  
56  
57  
58  
59  
60

1  
2  
3  
4  
5  
6  
7 homes, therefore, the misclassification of exposure is more likely among the older patient  
8  
9 groups. Secondly, although model based adjustments using regression and IPW were applied,  
10  
11 it is always possible that residual confounding factors could influence the results. E.g. statin  
12  
13 usage may depend on variables that are not included in the statistical models; or the  
14  
15 statistical models used in the analysis do not properly adjust for the confounding factors. The  
16  
17 importance of adjusting for possible confounding effects is reflected by the large difference  
18  
19 between estimates obtained from the uni- and multivariate models. On the other hand, the  
20  
21 results based on three models with different pattern of covariates and modeling technique  
22  
23 remained nearly unchanged regarding the effect of current statin usage (Table 3). This  
24  
25 compatibility increases the credibility of the results. Also, the hospital records that are  
26  
27 nationally gathered may suffer from inconsistencies. Recently, these were evaluated in a  
28  
29 separate study which validated this form of data collection in PE, but not in DVT[23].  
30  
31

32 In conclusion, statin use offers protection against first ever VTE event. The elevated LDL  
33  
34 cholesterol, CRP and homocysteine, as reported earlier also associate with the risk of new  
35  
36 VTE. Statins appears as a primary prevention tool in patients with a high risk of VTE, exerting  
37  
38 its best effect in male population.  
39  
40  
41  
42  
43  
44  
45  
46  
47  
48  
49  
50  
51  
52  
53  
54  
55  
56  
57  
58  
59  
60

## Acknowledgement

This study was funded by University of Helsinki and The National Institute for Health and Welfare, Finland (THL).

RL, AJ and JP have no relevant disclosures to declare. JH has had previous research agreements with Janssen-Cilag, Novartis, Orion Pharma, Abbott, Novo Nordisk Farma, Pfizer, Sanofi-Aventis, Astellas, and Takeda.

## Contributorship Statement

Formatted: Font: Bold

All authors have substantial contributions to the conception and design of the work and acquisition of the data. JH did analyses, all authors contributed to interpretation of data for the work

JH drafted the work, other authors revised it critically for important intellectual content.

All authors have approved the final version of the work to be published.

All authors have agreed to be accountable for all aspects of the work in ensuring that questions related to the accuracy or integrity of any part of the work are appropriately investigated and resolved.

## Competing Interests

None

## Data Sharing Statement

No additional data available

Formatted: Font: Bold

## References

1. Kearon C, Akl EA, Comerota AJ, *et al.* Antithrombotic therapy for VTE disease: Antithrombotic Therapy and Prevention of Thrombosis, 9th ed: American College of Chest Physicians Evidence-Based Clinical Practice Guidelines. *Chest* 2012;**141**:e419S–94S. doi:10.1378/chest.11-2301
2. Squizzato A, Galli M, Romualdi E, *et al.* Statins, fibrates, and venous thromboembolism: a meta-analysis. *Eur Heart J* 2010;**31**:1248–56. doi:10.1093/eurheartj/ehp556
3. Glynn RJ, Danielson E, Fonseca FAH, *et al.* A Randomized Trial of Rosuvastatin in the Prevention of Venous Thromboembolism. *New England Journal of Medicine* 2009;**360**:1851–61. doi:10.1056/NEJMoa0900241
4. Biere-Rafi S, Hutten BA, Squizzato A, *et al.* Statin treatment and the risk of recurrent pulmonary embolism. *Eur Heart J* 2013;**34**:1800–6. doi:10.1093/eurheartj/ehp046
5. Khemasuwan D, Divietro ML, Tangdhanakanond K, *et al.* Statins decrease the occurrence of venous thromboembolism in patients with cancer. *Am J Med* 2010;**123**:60–5. doi:10.1016/j.amjmed.2009.05.025
6. Akkerman JWN. From low-density lipoprotein to platelet activation. *Int J Biochem Cell Biol* 2008;**40**:2374–8. doi:10.1016/j.biocel.2008.04.002
7. Aromaa A, Koskinen S. Health and Functional Capacity in Finland. Baseline Results of the Health 2000 Health Examination Survey. Helsinki, Finland: 2004. <http://www.terveys2000.fi/julkaisut/baseline.pdf>
8. Heistaro S. Methodology report : Health 2000 survey. Helsinki, Finland: : Kansanterveyslaitos 2008. <http://lib.thl.fi:2345/http://lib.thl.fi:2345/lib4/?PBFORMTYPE=01002&TITLEID=49681&SQS=1:FIN:1::6:50::HTML&PL=0>
9. Luotola K, Pietilä A, Zeller T, *et al.* Associations between interleukin-1 (IL-1) gene variations or IL-1 receptor antagonist levels and the development of type 2 diabetes. *Journal of Internal Medicine* 2011;**269**:322–32. doi:10.1111/j.1365-2796.2010.02294.x
10. Juonala M, Viikari JSA, Laitinen T, *et al.* Interrelations Between Brachial Endothelial Function and Carotid Intima-Media Thickness in Young Adults The Cardiovascular Risk in Young Finns Study. *Circulation* 2004;**110**:2918–23. doi:10.1161/01.CIR.0000147540.88559.00
11. Kauppi M, Impivaara O, Mäki J, *et al.* Vitamin D status and common risk factors for bone fragility as determinants of quantitative ultrasound variables in a nationally representative population sample. *Bone* 2009;**45**:119–24. doi:10.1016/j.bone.2009.03.659

Field Code Changed

Formatted: English (U.S.)

- 1  
2  
3  
4  
5  
6  
7 12 WHOCC - ATC/DDD Index. [http://www.whooc.no/atc\\_ddd\\_index/](http://www.whooc.no/atc_ddd_index/) (accessed 11 Sep2012).
- 8  
9 13 Carstensen B, Plummer M, Laara E, *et al*. *Epi: A package for statistical analysis in*  
10 *epidemiology*. 2008. <http://www.pubhealth.ku.dk/bxc/Epi/>
- 11  
12 14 Cole SR, Hernan MA. Constructing Inverse Probability Weights for Marginal Structural  
13 Models. *Am J Epidemiol* 2008;**168**:656–64. doi:10.1093/aje/kwn164
- 14  
15 15 Rahimi K, Bhala N, Kamphuisen P, *et al*. Effect of Statins on Venous Thromboembolic  
16 Events: A Meta-analysis of Published and Unpublished Evidence from Randomised  
17 Controlled Trials. *PLoS Med* 2012;**9**:e1001310. doi:10.1371/journal.pmed.1001310
- 18  
19 16 Ridker PM, Pradhan A, MacFadyen JG, *et al*. Cardiovascular benefits and diabetes risks of  
20 statin therapy in primary prevention: an analysis from the JUPITER trial. *The Lancet*  
21 **11**;380:565–71. doi:10.1016/S0140-6736(12)61190-8
- 22  
23 17 Westerbacka J, Yki-Järvinen H, Turpeinen A, *et al*. Inhibition of Platelet-Collagen  
24 Interaction An In Vivo Action of Insulin Abolished by Insulin Resistance in Obesity.  
25 *Arterioscler Thromb Vasc Biol* 2002;**22**:167–72. doi:10.1161/hq0102.101546
- 26  
27 18 Psaty BM, Siscovick DS. Minimizing Bias Due to Confounding by Indication in Comparative  
28 Effectiveness Research The Importance of Restriction. *JAMA* 2010;**304**:897–8.  
29 doi:10.1001/jama.2010.1205
- 30  
31 19 Prandoni P, Ghirarduzzi A, Prins MH, *et al*. Venous thromboembolism and the risk of  
32 subsequent symptomatic atherosclerosis. *Journal of Thrombosis and Haemostasis*  
33 2006;**4**:1891–6. doi:10.1111/j.1538-7836.2006.02058.x
- 34  
35 20 Prandoni P, Noventa F, Milan M. Aspirin and recurrent venous thromboembolism.  
36 *Phlebology* 2013;**28 Suppl 1**:99–104. doi:10.1177/0268355512475040
- 37  
38 21 Kemmeren JM, Algra A, Grobbee DE. Third generation oral contraceptives and risk of  
39 venous thrombosis: meta-analysis. *BMJ* 2001;**323**:131. doi:10.1136/bmj.323.7305.131
- 40  
41 22 Shufelt CL, Bairey Merz CN. Contraceptive Hormone Use and Cardiovascular Disease.  
42 *Journal of the American College of Cardiology* 2009;**53**:221–31.  
43 doi:10.1016/j.jacc.2008.09.042
- 44  
45 23 Casez P, Labarère J, Sevestre M-A, *et al*. ICD-10 hospital discharge diagnosis codes were  
46 sensitive for identifying pulmonary embolism but not deep vein thrombosis. *Journal of*  
47 *Clinical Epidemiology* 2010;**63**:790–7. doi:10.1016/j.jclinepi.2009.09.002
- 48  
49  
50  
51  
52  
53  
54  
55  
56  
57  
58  
59  
60

## Tables

Table 1 Baseline characteristics of study population

| Categorical variables and usage of drugs at baseline      |                |               |             |                |           |                |
|-----------------------------------------------------------|----------------|---------------|-------------|----------------|-----------|----------------|
| <b>Sex</b>                                                | male           |               | 3589        | 45%            |           |                |
|                                                           | female         |               | 4336        | 55%            |           |                |
| <b>Blood glucose lowering drug</b>                        | no             |               | 7637        | 96%            |           |                |
|                                                           | yes            |               | 288         | 4%             |           |                |
| <b>Insulin</b>                                            | no             |               | 7787        | 98%            |           |                |
|                                                           | yes            |               | 138         | 2%             |           |                |
| <b>Antithrombotic agent</b>                               | no             |               | 7582        | 96%            |           |                |
|                                                           | yes            |               | 343         | 4%             |           |                |
| <b>Antiplatelet agent</b>                                 | no             |               | 7764        | 98%            |           |                |
|                                                           | yes            |               | 161         | 2%             |           |                |
| <b>Vitamin K antagonists</b>                              | no             |               | 7732        | 98%            |           |                |
|                                                           | yes            |               | 193         | 2%             |           |                |
| Continuous variables at baseline LDL cholesterol (mmol/L) |                |               |             |                |           |                |
|                                                           | <b>1st Qu.</b> | <b>Median</b> | <b>Mean</b> | <b>3rd Qu.</b> | <b>SD</b> | <b>Missing</b> |
| <b>Age</b>                                                | 42.0           | 52.0          | 54.7        | 66.0           | 16.1      | 100            |
| <b>Blood glucose (mmol/L)</b>                             | 5.0            | 5.3           | 5.6         | 5.7            | 1.3       | 1275           |
| <b>Total cholesterol (mmol/L)</b>                         | 5.1            | 5.9           | 5.9         | 6.6            | 1.1       | 1275           |
| <b>HDL cholesterol (mmol/L)</b>                           | 1.1            | 1.3           | 1.3         | 1.6            | 0.4       | 1275           |
| <b>LDL cholesterol (mmol/L)</b>                           | 3.1            | 3.8           | 3.8         | 4.5            | 1.2       | 1276           |
| <b>Triglycerides (mmol/L)</b>                             | 1.0            | 1.3           | 1.6         | 1.9            | 1.1       | 1275           |
| <b>Ratio HDL/Chol</b>                                     | 18.0           | 22.0          | 23.0        | 28.0           | 7.4       | 1275           |
| <b>CRP (mg/L)</b>                                         | 0.3            | 0.8           | 2.3         | 2.0            | 6.3       | 1694           |
| <b>Vitamin D3 (nmol/L)</b>                                | 33.0           | 43.0          | 44.9        | 55.0           | 16.9      | 1825           |
| <b>Homocysteine (µmol/L)</b>                              | 9.2            | 11.0          | 12.0        | 13.5           | 5.1       | 1825           |
| <b>Insulin (mU/L)</b>                                     | 5.0            | 7.0           | 9.6         | 11.0           | 30.3      | 1627           |



Table 2. Incidence of end-point events. RR (rate ratios) with 95% confidence intervals (CI) based on univariate Poisson regression model. Laboratory measurements in tertiles "[a,b]" means that interval a-b is closed left and open right. The data on variables are collected at baseline.

| Variable                           | P-years (1000) | Events | Incidence (1/1000) | 95% CI |       | RR    | 95% CI |       |
|------------------------------------|----------------|--------|--------------------|--------|-------|-------|--------|-------|
| <b>Current statin usage</b>        |                |        |                    |        |       |       |        |       |
| no                                 | 67.78          | 118    | 1.74               | 1.44   | 2.09  |       |        |       |
| yes                                | 11.17          | 18     | 1.61               | 0.95   | 2.55  | 0.93  | 0.56   | 1.52  |
| <b>Sex</b>                         |                |        |                    |        |       |       |        |       |
| male                               | 36.02          | 53     | 1.47               | 1.1    | 1.93  |       |        |       |
| female                             | 42.93          | 83     | 1.93               | 1.54   | 2.4   | 1.31  | 0.93   | 1.85  |
| <b>Age</b>                         |                |        |                    |        |       |       |        |       |
| (0,40]                             | 19.92          | 10     | 0.50               | 0.24   | 0.92  |       |        |       |
| (40,50]                            | 20.22          | 15     | 0.74               | 0.41   | 1.22  | 1.48  | 0.66   | 3.29  |
| (50,60]                            | 17.11          | 24     | 1.40               | 0.90   | 2.09  | 2.79  | 1.34   | 5.84  |
| (60,70]                            | 11.05          | 28     | 2.53               | 1.68   | 3.66  | 5.05  | 2.45   | 10.39 |
| (70,Inf]                           | 10.65          | 59     | 5.54               | 4.22   | 7.15  | 11.04 | 5.65   | 21.58 |
| <b>Insulin usage at baseline</b>   |                |        |                    |        |       |       |        |       |
| no                                 | 77.83          | 133    | 1.71               | 1.43   | 2.03  |       |        |       |
| yes                                | 1.12           | 3      | 2.68               | 0.55   | 7.83  | 1.57  | 0.50   | 4.92  |
| <b>Blood glucose lowering drug</b> |                |        |                    |        |       |       |        |       |
| no                                 | 76.71          | 124    | 1.62               | 1.34   | 1.93  |       |        |       |
| yes                                | 2.24           | 12     | 5.37               | 2.77   | 9.37  | 3.32  | 1.84   | 6.00  |
| <b>Antithrombotic agent usage</b>  |                |        |                    |        |       |       |        |       |
| no                                 | 76.7           | 120    | 1.56               | 1.30   | 1.87  |       |        |       |
| yes                                | 2.25           | 16     | 7.11               | 4.06   | 11.55 | 4.55  | 2.70   | 7.66  |
| <b>Antiplatelet agents usage</b>   |                |        |                    |        |       |       |        |       |
| no                                 | 77.87          | 126    | 1.62               | 1.35   | 1.93  |       |        |       |
| yes                                | 1.08           | 10     | 9.27               | 4.44   | 17.05 | 5.73  | 3.01   | 10.91 |
| <b>Vitamin K antagonists usage</b> |                |        |                    |        |       |       |        |       |
| no                                 | 77.7           | 128    | 1.65               | 1.37   | 1.96  |       |        |       |
| yes                                | 1.25           | 8      | 6.42               | 2.77   | 12.66 | 3.90  | 1.91   | 7.97  |
| <b>Blood glucose (mmol/L)</b>      |                |        |                    |        |       |       |        |       |
| [2.4,5.1]                          | 24.79          | 36     | 1.45               | 1.02   | 2.01  |       |        |       |
| (5.1,5.6]                          | 23.93          | 31     | 1.30               | 0.88   | 1.84  | 0.89  | 0.55   | 1.44  |
| (5.6,26.7]                         | 18.69          | 48     | 2.57               | 1.89   | 3.40  | 1.77  | 1.15   | 2.72  |
| <b>Total cholesterol (mmol/L)</b>  |                |        |                    |        |       |       |        |       |
| [1.9,5.4]                          | 23.71          | 36     | 1.52               | 1.06   | 2.10  |       |        |       |
| (5.4,6.3]                          | 21.33          | 33     | 1.55               | 1.06   | 1.02  | 0.64  | 1.63   | 1.02  |
| (6.3,11.7]                         | 22.38          | 46     | 2.06               | 1.50   | 1.35  | 0.88  | 2.09   | 1.35  |
| <b>HDL cholesterol (mmol/L)</b>    |                |        |                    |        |       |       |        |       |
| [0.23,1.13]                        | 22.39          | 45     | 2.01               | 1.46   |       |       |        |       |

|                                  |       |    |      |      |      |      |      |      |
|----------------------------------|-------|----|------|------|------|------|------|------|
| (1.13,1.45]                      | 22.45 | 33 | 1.47 | 1.01 | 0.73 | 0.47 | 1.15 | 0.73 |
| (1.45,3.41]                      | 22.57 | 37 | 1.64 | 1.15 | 0.82 | 0.53 | 1.26 | 0.82 |
| <b>LDL cholesterol (mmol/L)</b>  |       |    |      |      |      |      |      |      |
| [0,3.3]                          | 22.56 | 34 | 1.51 | 1.04 |      |      |      |      |
| (3.3,4.2]                        | 22.79 | 38 | 1.67 | 1.18 | 1.11 | 0.70 | 1.76 | 1.11 |
| (4.2,8.8]                        | 22.06 | 43 | 1.95 | 1.41 | 1.29 | 0.82 | 2.03 | 1.29 |
| <b>Triglycerides (mmol/L)</b>    |       |    |      |      |      |      |      |      |
| [0.4,1.1]                        | 26.16 | 30 | 1.15 | 0.77 |      |      |      |      |
| (1.1,1.7]                        | 21.84 | 45 | 2.06 | 1.50 | 1.80 | 1.13 | 2.85 | 1.80 |
| (1.7,16.6]                       | 19.42 | 40 | 2.06 | 1.47 | 1.80 | 1.12 | 2.88 | 1.80 |
| <b>Ratio HDL/Chol</b>            |       |    |      |      |      |      |      |      |
| [3,19]                           | 23.92 | 48 | 2.01 | 1.48 |      |      |      |      |
| (19,25.7]                        | 20.58 | 34 | 1.65 | 1.14 | 0.82 | 0.53 | 1.28 | 0.82 |
| (25.7,56]                        | 22.91 | 33 | 1.44 | 0.99 | 0.72 | 0.46 | 1.12 | 0.72 |
| <b>C-reactive protein (mg/L)</b> |       |    |      |      |      |      |      |      |
| [0,0.39]                         | 22.26 | 22 | 0.99 | 0.62 |      |      |      |      |
| (0.39,1.41]                      | 21.62 | 42 | 1.94 | 1.40 | 1.97 | 1.17 | 3.29 | 1.97 |
| (1.41,191]                       | 20.53 | 40 | 1.95 | 1.39 | 1.97 | 1.17 | 3.32 | 1.97 |
| <b>Vitamin D3 (nmol/L)</b>       |       |    |      |      |      |      |      |      |
| [5,36]                           | 20.55 | 35 | 1.70 | 1.19 | 2.37 |      |      |      |
| (36,50]                          | 21.42 | 31 | 1.45 | 0.98 | 2.06 | 0.85 | 0.52 | 1.38 |
| (50,134]                         | 21.15 | 37 | 1.75 | 1.23 | 2.41 | 1.03 | 0.65 | 1.63 |
| <b>Homocysteine (µmol/L)</b>     |       |    |      |      |      |      |      |      |
| [3.7,9.7]                        | 22.15 | 18 | 0.81 | 0.48 | 1.29 |      |      |      |
| (9.7,12.5]                       | 21.82 | 32 | 1.47 | 1.00 | 2.07 | 1.80 | 1.01 | 3.22 |
| (12.5,111]                       | 19.16 | 53 | 2.77 | 2.07 | 3.62 | 3.40 | 1.99 | 5.81 |
| <b>Insulin (mU/L)</b>            |       |    |      |      |      |      |      |      |
| [1,5]                            | 22.72 | 26 | 1.14 | 0.75 | 1.68 |      |      |      |
| (5,9]                            | 22.67 | 45 | 1.99 | 1.45 | 2.66 | 1.73 | 1.07 | 2.81 |
| (9,2200]                         | 19.64 | 33 | 1.68 | 1.16 | 2.36 | 1.47 | 0.88 | 2.00 |

Table 3. Rate ratios (RR) with 95% confidence intervals (CI) of three Poisson regression models. Model I included only statin, age and sex as covariates. Models II and III included also Blood glucose lowering drug, Insulin usage, Vitamin K antagonists usage, and Antiplatelet agents usage as covariates. Inverse Probability Weights (IPW) Model III is based on stabilized weights for statin usage. In IPW model age and sex were in numerator, and age, sex, baseline oral antidiabetics, baseline insulin, and baseline anticoagulant usage were in denominator.

|                             |          | Model I     |      |       | Model II    |      |       | Model III        |      |       |
|-----------------------------|----------|-------------|------|-------|-------------|------|-------|------------------|------|-------|
|                             |          | RR (95% CI) |      |       | RR (95% CI) |      |       | RR, IPW (95% CI) |      |       |
| Statin                      | no       | (reference) |      |       | (reference) |      |       | (reference)      |      |       |
|                             | current  | 0.64        | 0.38 | 1.05  | 0.60        | 0.36 | 1.00  | 0.58             | 0.35 | 0.96  |
| Age                         | under 40 | (reference) |      |       | (reference) |      |       | (reference)      |      |       |
|                             | (40,50]  | 1.52        | 0.68 | 3.38  | 1.51        | 0.68 | 3.37  | 1.53             | 0.68 | 3.43  |
|                             | (50,60]  | 2.99        | 1.42 | 6.26  | 2.91        | 1.39 | 6.10  | 3.20             | 1.53 | 6.70  |
|                             | (60,70]  | 5.66        | 2.73 | 11.75 | 5.31        | 2.55 | 11.05 | 5.36             | 2.55 | 11.24 |
|                             | (70,Inf] | 11.68       | 5.94 | 22.95 | 9.92        | 4.99 | 19.74 | 9.93             | 4.95 | 19.92 |
| Sex                         | male     | (reference) |      |       | (reference) |      |       | (reference)      |      |       |
|                             | female   | 1.02        | 0.72 | 1.45  | 1.02        | 0.72 | 1.46  | 0.99             | 0.70 | 1.41  |
| Blood glucose lowering drug | no       | (reference) |      |       | (reference) |      |       | (reference)      |      |       |
|                             | yes      | 1.89        | 0.98 | 3.63  | 1.63        | 0.86 | 3.11  | 1.63             | 0.86 | 3.11  |
| Insulin usage               | no       | (reference) |      |       | (reference) |      |       | (reference)      |      |       |
|                             | yes      | 0.72        | 0.21 | 2.45  | 0.72        | 0.25 | 2.13  | 0.72             | 0.25 | 2.13  |
| Vitamin K antagonists       | no       | (reference) |      |       | (reference) |      |       | (reference)      |      |       |
|                             | yes      | 1.46        | 0.69 | 3.07  | 1.38        | 0.68 | 2.80  | 1.38             | 0.68 | 2.80  |
| Antiplatelet agents         | no       | (reference) |      |       | (reference) |      |       | (reference)      |      |       |
|                             | yes      | 2.33        | 1.20 | 4.53  | 2.60        | 1.42 | 4.76  | 2.60             | 1.42 | 4.76  |

Table 4. Statin usage and sex, interaction model. Model included age, Blood glucose lowering drug, Insulin usage, Vitamin K antagonists usage, and Antiplatelet agents usage as covariates.

|                  | P-years | Events | Incidence (95% CI) |      |      | RR (95% CI) |      |      |
|------------------|---------|--------|--------------------|------|------|-------------|------|------|
| no statin/male   | 30.57   | 50     | 1.64               | 1.21 | 2.16 | (reference) |      |      |
| statin/male      | 5.45    | 3      | 0.55               | 0.11 | 1.61 | 0.20        | 0.06 | 0.65 |
| no statin/female | 37.21   | 68     | 1.83               | 1.42 | 2.32 | 0.87        | 0.60 | 1.27 |
| statin/female    | 5.72    | 15     | 2.62               | 1.47 | 4.33 | 0.75        | 0.41 | 1.38 |

STROBE Statement—Checklist of items that should be included in reports of *cohort studies*

|                           | Item No | Recommendation                                                                                                                                                                                                                                                                                                                                                 |
|---------------------------|---------|----------------------------------------------------------------------------------------------------------------------------------------------------------------------------------------------------------------------------------------------------------------------------------------------------------------------------------------------------------------|
| <b>Title and abstract</b> | 1       | (a) Indicate the study's design with a commonly used term in the title or the abstract<br><b>Statin use associates with a reduced incidence of venous thromboembolism – A population-based cohort study</b><br>(b) Provide in the abstract an informative and balanced summary of what was done and what was found<br><b>Done</b>                              |
| <b>Introduction</b>       |         |                                                                                                                                                                                                                                                                                                                                                                |
| Background/rationale      | 2       | Explain the scientific background and rationale for the investigation being reported<br><b>Done</b>                                                                                                                                                                                                                                                            |
| Objectives                | 3       | State specific objectives, including any prespecified hypotheses<br>Done                                                                                                                                                                                                                                                                                       |
| <b>Methods</b>            |         |                                                                                                                                                                                                                                                                                                                                                                |
| Study design              | 4       | Present key elements of study design early in the paper<br>Done                                                                                                                                                                                                                                                                                                |
| Setting                   | 5       | Describe the setting, locations, and relevant dates, including periods of recruitment, exposure, follow-up, and data collection<br>Done                                                                                                                                                                                                                        |
| Participants              | 6       | (a) Give the eligibility criteria, and the sources and methods of selection of participants. Describe methods of follow-up<br>Done<br><del>(b) For matched studies, give matching criteria and number of exposed and unexposed</del>                                                                                                                           |
| Variables                 | 7       | Clearly define all outcomes, exposures, predictors, potential confounders, and effect modifiers. Give diagnostic criteria, if applicable<br>Done                                                                                                                                                                                                               |
| Data sources/measurement  | 8*      | For each variable of interest, give sources of data and details of methods of assessment (measurement). Describe comparability of assessment methods if there is more than one group<br>Done                                                                                                                                                                   |
| Bias                      | 9       | Describe any efforts to address potential sources of bias<br>Done                                                                                                                                                                                                                                                                                              |
| Study size                | 10      | Explain how the study size was arrived at<br>Done                                                                                                                                                                                                                                                                                                              |
| Quantitative variables    | 11      | Explain how quantitative variables were handled in the analyses. If applicable, describe which groupings were chosen and why<br>Done                                                                                                                                                                                                                           |
| Statistical methods       | 12      | (a) Describe all statistical methods, including those used to control for confounding<br>Done<br>(b) Describe any methods used to examine subgroups and interactions<br>Done<br>(c) Explain how missing data were addressed<br>Done<br>(d) If applicable, explain how loss to follow-up was addressed<br>Done<br>(e) Describe any sensitivity analyses<br>Done |

| <b>Results</b>           |     |                                                                                                                                                                                                                                                                                       |
|--------------------------|-----|---------------------------------------------------------------------------------------------------------------------------------------------------------------------------------------------------------------------------------------------------------------------------------------|
| Participants             | 13* | (a) Report numbers of individuals at each stage of study—eg numbers potentially eligible, examined for eligibility, confirmed eligible, included in the study, completing follow-up, and analysed<br><b>Done</b>                                                                      |
|                          |     | (b) Give reasons for non-participation at each stage<br><b>Done</b>                                                                                                                                                                                                                   |
|                          |     | (c) Consider use of a flow diagram<br>Not included, presented in previous papers                                                                                                                                                                                                      |
| Descriptive data         | 14* | (a) Give characteristics of study participants (eg demographic, clinical, social) and information on exposures and potential confounders<br><b>Done</b>                                                                                                                               |
|                          |     | (b) Indicate number of participants with missing data for each variable of interest<br><b>Done</b>                                                                                                                                                                                    |
|                          |     | (c) Summarise follow-up time (eg, average and total amount)<br><b>Done</b>                                                                                                                                                                                                            |
| Outcome data             | 15* | Report numbers of outcome events or summary measures over time                                                                                                                                                                                                                        |
| Main results             | 16  | (a) Give unadjusted estimates and, if applicable, confounder-adjusted estimates and their precision (eg, 95% confidence interval). Make clear which confounders were adjusted for and why they were included<br><b>Done, 95% Ci given, interaction test with p-value and X2 test.</b> |
|                          |     | (b) Report category boundaries when continuous variables were categorized<br><b>Done</b>                                                                                                                                                                                              |
|                          |     | (c) If relevant, consider translating estimates of relative risk into absolute risk for a meaningful time period<br>Not done because of brevity. Easy to do if needed with data in tables.                                                                                            |
| Other analyses           | 17  | Report other analyses done—eg analyses of subgroups and interactions, and sensitivity analyses<br><b>Done</b>                                                                                                                                                                         |
| <b>Discussion</b>        |     |                                                                                                                                                                                                                                                                                       |
| Key results              | 18  | Summarise key results with reference to study objectives<br><b>Done</b>                                                                                                                                                                                                               |
| Limitations              | 19  | Discuss limitations of the study, taking into account sources of potential bias or imprecision. Discuss both direction and magnitude of any potential bias<br><b>Done</b>                                                                                                             |
| Interpretation           | 20  | Give a cautious overall interpretation of results considering objectives, limitations, multiplicity of analyses, results from similar studies, and other relevant evidence<br><b>Done</b>                                                                                             |
| Generalisability         | 21  | Discuss the generalisability (external validity) of the study results<br><b>Done. This is population based study.</b>                                                                                                                                                                 |
| <b>Other information</b> |     |                                                                                                                                                                                                                                                                                       |
| Funding                  | 22  | Give the source of funding and the role of the funders for the present study and, if applicable, for the original study on which the present article is based<br>Details give, not extra funding.                                                                                     |

\*Give information separately for exposed and unexposed groups.

1 **Note:** An Explanation and Elaboration article discusses each checklist item and gives methodological background and  
2 published examples of transparent reporting. The STROBE checklist is best used in conjunction with this article (freely  
3 available on the Web sites of PLoS Medicine at <http://www.plosmedicine.org/>, Annals of Internal Medicine at  
4 <http://www.annals.org/>, and Epidemiology at <http://www.epidem.com/>). Information on the STROBE Initiative is  
5 available at <http://www.strobe-statement.org>.  
6  
7  
8  
9  
10  
11  
12  
13  
14  
15  
16  
17  
18  
19  
20  
21  
22  
23  
24  
25  
26  
27  
28  
29  
30  
31  
32  
33  
34  
35  
36  
37  
38  
39  
40  
41  
42  
43  
44  
45  
46  
47  
48  
49  
50  
51  
52  
53  
54  
55  
56  
57  
58  
59  
60

For peer review only

# BMJ Open

## The association of statin use with a reduced incidence of venous thromboembolism – A population-based cohort study

|                                 |                                                                                                                                                                                                                                                                              |
|---------------------------------|------------------------------------------------------------------------------------------------------------------------------------------------------------------------------------------------------------------------------------------------------------------------------|
| Journal:                        | <i>BMJ Open</i>                                                                                                                                                                                                                                                              |
| Manuscript ID:                  | bmjopen-2014-005862.R1                                                                                                                                                                                                                                                       |
| Article Type:                   | Research                                                                                                                                                                                                                                                                     |
| Date Submitted by the Author:   | 02-Sep-2014                                                                                                                                                                                                                                                                  |
| Complete List of Authors:       | Lassila, Riitta; Medical Faculty, University of Helsinki<br>Jula, Antti; The National Institute for Health and Welfare,<br>Pitkaniemi, Janne; University of Helsinki, Hjelt Institute, Public Health<br>Haukka, Jari; University of Helsinki, Hjelt Institute, Public Health |
| <b>Primary Subject Heading</b>: | Cardiovascular medicine                                                                                                                                                                                                                                                      |
| Secondary Subject Heading:      | Epidemiology                                                                                                                                                                                                                                                                 |
| Keywords:                       | Thromboembolism < CARDIOLOGY, EPIDEMIOLOGY, Anticoagulation < HAEMATOLOGY                                                                                                                                                                                                    |
|                                 |                                                                                                                                                                                                                                                                              |

SCHOLARONE™  
Manuscripts

# Statin use associates with a reduced incidence of venous thromboembolism – A population-based cohort study

---

<sup>1</sup>Riitta LassilaMD, PhD, <sup>2</sup>Antti Jula, MD, PhD, <sup>3</sup> JannePitkäniemi, PhD,  
and <sup>3</sup>Jari Haukka, MD, PhD

<sup>1</sup>Coagulation Disorders Unit, Department of Medicine, Division of Hematology and Laboratory Services HUSLAB and Clinical Chemistry, Helsinki University Central Hospital, Helsinki, Finland

<sup>2</sup>The National Institute for Health and Welfare (THL), Finland

<sup>3</sup>Hjelt Institute, University of Helsinki, Finland

**Corresponding author:**

Jari Haukka  
University of Helsinki, Hjelt Institute  
PO Box 40, FI-00014 University of Helsinki, Finland  
email: [jari.haukka@helsinki.fi](mailto:jari.haukka@helsinki.fi)  
tel.: +358 50 4155314  
fax.: +358 09 191 27518

**Keywords:** venous thromboembolism, epidemiology, statins, cohort study

**Word count:** 2978



## Abstract

**Objectives:** Venous thromboembolism (VTE) continues to be a frequent, medical emergency demanding condition to reach the diagnosis and initiate anticoagulation therapy. The use of statins is reported, in addition to reducing the incidence of arterial thrombosis, also to decrease both the incidence and reoccurrence of VTE. The aim of our study was to explore the association between statin usage and the incidence of new VTE at the population level during a 10-year follow-up.

**Design:** Population based historic cohort

**Setting:** The Health 2000 survey was based on a nationally representative sample.

**Participants:** 8028 individuals aged 30 years or over in Finland.

**Primary and secondary outcome measures:** The primary end-point event was the first ever hospitalization due to one of the following causes: pulmonary embolism (ICD10 I26), cerebral venous nonpyogenic thrombosis (I63.6), and venous thrombosis (I80.0-189).

**Results:** The preselected explanatory variables applied to Poisson regression model were statin usage (no/yes) during follow-up (2000-2011) and several baseline data (age, sex; usage of blood glucose lowering drug, vitamin K antagonists, and anti-platelet agents). We observed 136 VTE events, the incidence of 1.72 (95% CI 1.44-2.04) per 1000 person-years. Current statin usage did not associate with the incidence of VTE according to the univariate model (RR 0.93, 0.56-1.52), but when adjusted with baseline variables (age, sex, medications) the RR declined to 0.60 (0.36-1.00,  $p=0.04$ ).

**Conclusions:** Statin use offers protection against first ever VTE event and appears as a primary prevention tool in patients without anticoagulation or anti-platelet medication.

### Strengths of this study

- population based, no selection bias in start of follow-up
- long and complete follow-up information

### Limitations of this study

- limited number of background variables and incidence events
- the comprehensive use of prescribed drugs in this study, could not be verified with certainty

### Introduction

Venous thromboembolism (VTE) continues to be a frequent condition which demands medical emergency attention to reach the diagnosis and initiate anticoagulation therapy. The mortality during a few months after VTE varies between 5-20%, and the patients often have other co-morbidities, such as cardiovascular disease and cancer. The yearly incidence of VTE is 1-2/1000 inhabitants in western societies. Nowadays, the traditional heparin and vitamin K antagonist (VKA) therapy followed with the course of temporal (3-6 months) or permanent VKA can be opted with novel oral anticoagulants[1].

The decision of either continuing the anticoagulation for a few months or permanently depends on the acquired or inherited risk factor profile of the patient. This includes age above 60 years and concomitant illness, including cancer and inflammatory diseases as well as obesity, hormonal remedies and family history or severe thrombophilias (such as homozygosity of factor V Leiden or prothrombin mutation, double defects, antiphospholipid antibody syndrome), subjecting the patient to recurrent VTE. Despite the clinical evaluation the recurrence rate of VTE continues to

1  
2  
3 be 15-20% after an idiopathic event and around 5% after a provoked thrombosis[1]. Bleeding  
4  
5 tendency needs to be regularly weighted also against the risk of thrombosis recurrence, while  
6  
7 maintaining the anticoagulation.  
8  
9

10  
11 The use of statins has been reported to reduce the incidence of not only the arterial thrombosis,  
12  
13 but also interesting data on the decline of both the incidence and reoccurrence of VTE have  
14  
15 emerged. Retrospective observational and case-control studies as well as experimental evidence  
16  
17 refer to the possibility that statins exert an antithrombotic effect also in the venous system. A  
18  
19 recent meta-analysis reported the association of VTE and a 20-36% protection with statin use[2]. A  
20  
21 primary prevention trial of VTE with rosuvastatin in a randomized placebo-controlled design  
22  
23 showed a 48% reduction in the incidence of VTE[3]. Moreover, statin treatment alleviated the risk  
24  
25 of recurrent pulmonary embolism by 50% whether the patient used long-term vitamin K  
26  
27 antagonist treatment or had stopped anticoagulation, as reported by a Dutch population-based  
28  
29 study with initially hospitalized patients[4]. Finally, statins decrease the occurrence of venous  
30  
31 thromboembolism even in patients with cancer[5].  
32  
33  
34  
35  
36  
37

38 Statins reduce the procoagulant activity of platelet membranes and downplay the signaling via LDL  
39  
40 receptors, which are engaged with the platelet activation[6]. Statins also enhance fibrinolysis by  
41  
42 reducing the plasminogen activator inhibitor-1 and triglyceride concentration. Also, other  
43  
44 pleiotropic and anti-inflammatory mechanisms, including dampened tissue factor expression by  
45  
46 monocytes, have been described which can attenuate the risk of thrombosis.  
47  
48  
49  
50

51  
52 The aim of the study was to explore the association between statin usage and incidence of the  
53  
54 first ever VTE in Finland. Our study utilizes a nationally representative sample of 8028 persons  
55  
56  
57  
58  
59  
60

1  
2  
3 aged >30 years [7] of The Health 2000 Survey and a prospective observational pharmaco-  
4  
5 epidemiological design.  
6  
7

## 8 9 **Material and methods**

### 10 11 **Study population**

12  
13  
14  
15  
16 The Health 2000 survey was based on a nationally representative sample of 8028  
17  
18 individuals aged 30 years or over in Finland. To ensure that sample is representative of the  
19  
20 Finnish population, a two-stage stratified cluster sampling procedure was used. The baseline  
21  
22 data collection from study subjects took place between September 2000 and June 2001, and  
23  
24 consisted of an interview and a comprehensive health examination. Of the study sample 6986  
25  
26 subjects (87 %) were interviewed at their home or in an institution, 6354 subjects (79 %)  
27  
28 took part in a comprehensive health examination and 416 subjects (5%) were examined at  
29  
30 their home. The Health 2000 study was approved by the Ethics Committees of the National  
31  
32 Public Health Institute (since 2009 the National Institute for Health and Welfare) and the  
33  
34 Hospital District of Helsinki and Uusimaa, and the participants gave written informed  
35  
36 consent[7].  
37  
38  
39  
40  
41

### 42 43 **Follow-up time and end-points**

44  
45  
46 The primary end-point event of this study was the first hospitalization due one of the  
47  
48 following causes: pulmonary embolism (ICD10 I26), cerebral infarction due to cerebral  
49  
50 venous nonpyogenic thrombosis (I63.6), deep vein thrombosis, including thrombophlebitis of  
51  
52 lower extremities (I80.0-I80.9). The information about end-points was obtained from  
53  
54 National Hospital Discharge Register that covers all hospitalizations in Finland starting from  
55  
56 1969. The 10-year follow-up was started at the beginning of Health 2000 Study and was  
57  
58  
59  
60

1  
2  
3 stopped at death, end of year 2011, or end-point, whichever occurred first. The data about  
4  
5 deaths were obtained from the Statistics Finland. There were 103 individuals with recorder  
6  
7 primary end-point before the start of follow-up compatible with the general prevalence of the  
8  
9 disease, and these subjects were excluded from the study population. Thus, the size of study  
10  
11 population in the start of follow-up was 7925.  
12  
13

### 14 15 **Laboratory measurements**

16  
17 Venous blood samples were drawn from the antecubital vein after a minimum of 4 h fasting.  
18  
19 HDL cholesterol, total cholesterol, triglyceride and plasma glucose concentrations were  
20  
21 determined enzymatically (Roche Diagnostics, GmbH, Mannheim, Germany for HDL; Olympus  
22  
23 System Reagent, Hamburg, Germany for total cholesterol, triglycerides and glucose) with a  
24  
25 clinical chemistry analyser (Olympus, AU400, Hamburg, Germany)[8]. C-reactive protein  
26  
27 (CRP) concentrations were determined by a chemiluminescent immunometric assay  
28  
29 (Immulite, Diagnostic Products, Los Angeles, CA)[8]. LDL cholesterol was calculated with the  
30  
31 Friedewald formula. Plasma insulin and homocysteine concentrations were determined with  
32  
33 microparticle enzyme immunoassay (Abbott Laboratories, Dainabot, Tokyo, Japan)[9,10]. S-  
34  
35 25(OH)D concentrations were measured by radioimmunoassay (Incstar, Stillwater, MN,  
36  
37 USA)[11].  
38  
39  
40  
41  
42  
43

### 44 45 **Drug information**

46  
47 The data about the prescribed and purchased drugs were obtained from registers of the Social  
48  
49 Insurance Institution. We had records of the following drugs classified by Anatomical  
50  
51 Therapeutic Chemical (ATC) code[12]: statins (C10AA), blood glucose lowering drugs,  
52  
53 excluding insulins (A10B), insulin (A10A), VKA (B01AA) , and antiplatelet agents, excluding  
54  
55 heparin (B01AC) and over the counter acetylsalicylic acid. Regarding statins the data included  
56  
57 all prescribed statins purchased during the follow-up period in 2000 – 2006 and 2008.  
58  
59  
60

1  
2  
3 Because there were no data available regarding the drug amounts purchased for years 2007,  
4 and 2009-2011, we calculated the mean amount of purchase based on available years and  
5 adapted it for the whole follow-up period. Time dependent variable for the current statin  
6 usage was determined for each individual with the prescription data using R language  
7 package Epi[13]. The follow-up time of each individual with statin exposure was cut into 6-  
8 month periods and the statin usage in each period was determined. For other drugs we had  
9 only the number of prescriptions at the baseline year 2000, which was used to construct a  
10 dichotomic variable of drug usage at baseline (no/yes).  
11  
12  
13  
14  
15  
16  
17  
18  
19  
20  
21  
22  
23  
24  
25

### 26 **Statistical modeling**

27  
28 We applied the Poisson regression model using end-point event as a dependent variable,  
29 length of the follow-up as an offset variable, and statin usage (no/yes) during each time  
30 period as time-varying explanatory variable. The following variables were used as time-  
31 invariant variables measured at baseline: age (30-40, 40-50, 50-60, 60-70, over 70), sex  
32 (male/female), blood glucose lowering drug usage, excluding insulins (no/yes), insulin usage  
33 (no/yes), vitamin K antagonists usage (no/yes), antiplatelet agents (no/yes), blood glucose  
34 (mmol/L), total cholesterol (mmol/L), HDL cholesterol (mmol/L), LDL cholesterol (mmol/L),  
35 triglycerides (mmol/L), CRP (mg/L), vitamin D3 (nmol/L), homocysteine ( $\mu\text{mol/L}$ ), and  
36 insulin (mU/L). The values of the laboratory measurements were transformed to categorical  
37 variables defined by tertiles. We also estimated the inverse probability weights (IPW) to fit  
38 marginal structural models[14]. IPW were estimated using age and sex in the numerator, and  
39 age, sex, blood glucose lowering drugs other than insulin usage, VKA usage, and use of  
40 antiplatelet agent in the denominator. In order to check survivor bias we carried out  
41  
42  
43  
44  
45  
46  
47  
48  
49  
50  
51  
52  
53  
54  
55  
56  
57  
58  
59  
60

1  
2  
3 modeling without subjects with prevalent statin use in start of follow-up (N=460 excluded)  
4  
5 [15].  
6  
7

## 8 9 **Results**

10  
11  
12 The size of the study population was 7925, including 3589 males and 4336 females (Table 1).  
13  
14 We observed 136 VTE events during the follow-up with the incidence of 1.72 (95% CI 1.44-  
15  
16 2.04) per 1000 person-years during the mean follow-up time 10 years (Table 2). There were  
17  
18 64 events with the diagnosis pulmonary embolism (ICD-10 I26), one with sinus thrombosis  
19  
20 (I636) and 71 with deep vein thrombosis (I80.0-I80.9).  
21  
22  
23

24  
25  
26 All together there were 67,532 statin prescriptions, and 2083 individuals (26% of population)  
27  
28 had at least one prescription. Simvastatin (ATC code C10AA01) with 54% of prescriptions  
29  
30 and atorvastatin (C10AA05) with 23% represented the most frequent active lipid-lowering  
31  
32 substances. Current statin usage that comprised 14% of all cumulated person-years, did not  
33  
34 associate with the incidence of VTE according to the univariate model Rate Ratio (RR) 0.93  
35  
36 (0.56-1.52)(Table 2). The use of oral antidiabetic drugs at the baseline was associated with a  
37  
38 three-fold increased incidence (RR 3.32, 1.84-6.00), but insulin usage did not show any  
39  
40 association. Using any antithrombotic drugs associated with higher incidence (RR 4.55, 2.70-  
41  
42 7.66).  
43  
44  
45  
46  
47  
48

49  
50 Addition of more explanatory variables in the model substantially altered the association  
51  
52 between the statin usage and incidence (Table 3). Adjusting for sex, age, baseline oral  
53  
54 antidiabetic, insulin, and use of antithrombotics (Model II) reduced the RR to 0.60 (0.36-1.00).  
55  
56 Using IPW for the structural model (Model III) decreased the RR further to 0.58 (0.35-0.96).  
57  
58  
59  
60

1  
2  
3 Adjusting for the baseline laboratory measurements also decreased slightly the estimate for  
4  
5 statin effect, e.g. adjusting for CRP gave RR 0.43 (0.23- 0.81). However, because of the missing  
6  
7 laboratory measurements we do not report these results in further detail, e.g. for CRP there  
8  
9 were several (1694) missing values. (Table 2). Increased levels of LDL associated with an  
10  
11 increasing incidence of VTE, the same occurred with homocysteine.  
12  
13

14  
15  
16 In addition, we looked for the possible interactions between statin usage and age, sex, blood  
17  
18 glucose lowering drugs usage (excluding use of insulin), VKA and platelet aggregation  
19  
20 inhibitors. Interaction for sex and statin usage was significant ( $\chi^2=6.310$ ,  $df=1$ ,  $p=0.012$ ).  
21  
22

23 Interestingly, it turned out that the incidence of VTE among the statin group for males was  
24  
25 quite low (RR 0.22, 0.06-0.65), but for females such an association was not obvious (RR 0.75,  
26  
27 0.41-1.38), upon comparing the statin usage without its usage (Table 4.).  
28  
29

30  
31  
32 In sensitivity analyses without prevalent statin users there was 115 cases in non-statin group  
33  
34 and 10 cases in statin group; unadjusted RR was 0.82 (0.43- 1.56) and adjusted 0.63 ( 0.33-  
35  
36 1.21).  
37  
38

## 39 40 41 Discussion

42  
43 To our knowledge, this is the first report studying association between statin usage and VTE  
44  
45 that utilizes a nationally representative population sample. Our results during the 11 years of  
46  
47 prospective follow-up on the incidence of VTE are in line with the recent meta-analysis[16],  
48  
49 which showed the risk reduction of 0.89 (0.78-1.01) for VTE among statin users. The  
50  
51 JUPITER study, the largest randomized trial, including 465 events, showed 36% reduction in  
52  
53 VTE (RR 0.64, 0.39-1.06,  $p=0.08$ )[3,16]. Our study addressed the new incidence of VTE, as  
54  
55 the patients who previously had suffered from VTE (136/8028) were excluded from study  
56  
57  
58  
59  
60



1  
2  
3 population. The prospective nature and large population-based design of pharmaco-  
4  
5 epidemiology are the strengths of our study.  
6  
7

8  
9  
10 In this freely living Finnish population sample we could demonstrate that statin use is  
11  
12 associated with a reduction of the incidence of VTE, including both deep vein thrombosis of  
13  
14 the lower extremities, pulmonary embolism and one case of cerebrovascular sinus  
15  
16 thrombosis. This adds to the confirmation that statins exert anticoagulant activity[2-5].  
17  
18 Furthermore, it supports the idea that statin therapy could be implemented to the patients  
19  
20 with the risk of VTE.  
21  
22

23  
24  
25 We observed that use of oral antidiabetic drugs at the baseline was associated with a three-  
26  
27 fold increased incidence (RR 3.32, 1.84-6.00), which refers to that insulin-resistant patients  
28  
29 carry a high risk of VTE, and the oral antidiabetic drugs do not seem to alleviate this risk,  
30  
31 while insulin may do so[18]. The positive association between antithrombotic drugs and VTE  
32  
33 is quite probably due to confounding by indication[19], and also the co-occurrence of  
34  
35 cardiovascular disease and VTE has been noted in several studies[20]. The limitation of our  
36  
37 study relies on the fact that over-the counter aspirin use is not controlled. This is significant,  
38  
39 as aspirin has been recently shown to inhibit the reoccurrence of idiopathic VTE[21].  
40  
41  
42  
43  
44

45  
46 Men seemed to respond to statin use more favourably than females, indicating a plausible  
47  
48 hormonal regulation of the effect of statins. In women we did not control for hormonal  
49  
50 replacement therapy, which may be a confounding remedy, known to be a risk factor for  
51  
52 VTE[22,23] The well-known age-association in increasing the incidence of DVT and PE was  
53  
54 evidenced also among our patients. Also, the overall incidence of VTE in Finland is compatible  
55  
56 with what has been reported internationally. The protective association with incidence of VTE  
57  
58  
59  
60

1  
2  
3 among highest third tertile of HDL-LDL ratio, lowest homocysteine and CRP support earlier  
4  
5 results of these surrogate laboratory markers.  
6  
7

8  
9  
10 Several limitations must be kept in mind when evaluating results from any observational  
11  
12 study based on record linkage of drug information. Firstly, the comprehensive use of  
13  
14 prescribed drugs in this study, could not be verified with certainty, and may be subject to  
15  
16 misclassification. The prescription data do not contain information on drugs used in nursing  
17  
18 homes, therefore, the misclassification of exposure is more likely among the older patient  
19  
20 groups. Secondly, although model based adjustments using regression and IPW were applied,  
21  
22 it is always possible that residual confounding factors could influence the results. E.g. statin  
23  
24 usage may depend on variables that are not included in the statistical models; or the  
25  
26 statistical models used in the analysis do not properly adjust for the confounding factors. The  
27  
28 importance of adjusting for possible confounding effects is reflected by the large difference  
29  
30 between estimates obtained from the uni- and multivariate models. On the other hand, the  
31  
32 results based on the three models with different pattern of covariates and modeling technique  
33  
34 remained nearly unchanged regarding the effect of current statin usage (Table 3). This  
35  
36 compatibility increases the credibility of the results, albeit the actual incidences are relatively  
37  
38 low in numbers due to the natural incidence of 1-2 cases/1000 inhabitants annually. Also, the  
39  
40 hospital records that are nationally gathered may suffer from inconsistencies. Recently, these  
41  
42 were evaluated in a separate study which validated this form of data collection in PE, but not  
43  
44 in DVT[24]. Thirdly, analyses without prevalent statin showed attenuated, not significant  
45  
46 effect, which may be due to lower effect and lower number of cases resulting wider  
47  
48 confidence limits.  
49  
50  
51  
52  
53  
54  
55  
56  
57  
58  
59  
60

1  
2  
3 In conclusion, statin use offers protection against first ever VTE event. The elevated LDL  
4  
5 cholesterol, CRP and homocysteine, as reported earlier also associate with the risk of new  
6  
7 VTE. Statins appears as a primary prevention tool in patients with a high risk of VTE, exerting  
8  
9 its best effect in male population.  
10  
11  
12  
13  
14  
15  
16  
17  
18  
19  
20  
21  
22  
23  
24  
25  
26  
27  
28  
29  
30  
31  
32  
33  
34  
35  
36  
37  
38  
39  
40  
41  
42  
43  
44  
45  
46  
47  
48  
49  
50  
51  
52  
53  
54  
55  
56  
57  
58  
59  
60

For peer review only

## Acknowledgement

All authors have substantially contributed to conception and design, acquisition of data, and analysis and interpretation of data; RL and JH have drafted the article, and AJ and JP have revised it critically for important intellectual content; all authors have finally approved the version to be published. RL, AJ and JP have no relevant disclosures to declare. JH has had previous research agreements with Janssen-Cilag, Novartis, Orion Pharma, Abbott, Novo Nordisk Farma, Pfizer, Sanofi-Aventis, Astellas, and Takeda. This study was funded by University of Helsinki and The National Institute for Health and Welfare, Finland (THL). No data sharing is possible because of data protection.

## Contributorship Statement

All authors have substantial contributions to the conception and design of the work and acquisition of the data. JH did analyses, all authors contributed to interpretation of data for the work.

JH drafted the work, other authors revised it critically for important intellectual content.

All authors have approved the final version of the work to be published.

All authors have agreed to be accountable for all aspects of the work in ensuring that questions related to the accuracy or integrity of any part of the work are appropriately investigated and resolved.

## Competing Interests

None

## Data Sharing Statement

No additional data available

## References

- 1 Kearon C, Akl EA, Comerota AJ, *et al.* Antithrombotic therapy for VTE disease: Antithrombotic Therapy and Prevention of Thrombosis, 9th ed: American College of Chest Physicians Evidence-Based Clinical Practice Guidelines. *Chest* 2012;**141**:e419S–94S. doi:10.1378/chest.11-2301
- 2 Squizzato A, Galli M, Romualdi E, *et al.* Statins, fibrates, and venous thromboembolism: a meta-analysis. *Eur Heart J* 2010;**31**:1248–56. doi:10.1093/eurheartj/ehp556
- 3 Glynn RJ, Danielson E, Fonseca FAH, *et al.* A Randomized Trial of Rosuvastatin in the Prevention of Venous Thromboembolism. *New England Journal of Medicine* 2009;**360**:1851–61. doi:10.1056/NEJMoa0900241
- 4 Biere-Rafi S, Hutten BA, Squizzato A, *et al.* Statin treatment and the risk of recurrent pulmonary embolism. *Eur Heart J* 2013;**34**:1800–6. doi:10.1093/eurheartj/ehp046
- 5 Khemasuwan D, Divietro ML, Tangdhanakanond K, *et al.* Statins decrease the occurrence of venous thromboembolism in patients with cancer. *Am J Med* 2010;**123**:60–5. doi:10.1016/j.amjmed.2009.05.025
- 6 Akkerman JWN. From low-density lipoprotein to platelet activation. *Int J Biochem Cell Biol* 2008;**40**:2374–8. doi:10.1016/j.biocel.2008.04.002
- 7 Aromaa A, Koskinen S. Health and Functional Capacity in Finland. Baseline Results of the Health 2000 Health Examination Survey. Helsinki, Finland: 2004. [http://www.terveys2000.fi/julkaisut/baseline.pdf](http://www terveys2000.fi/julkaisut/baseline.pdf)
- 8 Heistaro S. Methodology report : Health 2000 survey. Helsinki, Finland: : Kansanterveyslaitos 2008. <http://lib.thl.fi:2345/http://lib.thl.fi:2345/lib4/?PBFORMTYPE=01002&TITLEID=49681&SQS=1:FIN:1::6:50::HTML&PL=0>
- 9 Luotola K, Pietilä A, Zeller T, *et al.* Associations between interleukin-1 (IL-1) gene variations or IL-1 receptor antagonist levels and the development of type 2 diabetes. *Journal of Internal Medicine* 2011;**269**:322–32. doi:10.1111/j.1365-2796.2010.02294.x
- 10 Juonala M, Viikari JSA, Laitinen T, *et al.* Interrelations Between Brachial Endothelial Function and Carotid Intima-Media Thickness in Young Adults The Cardiovascular Risk in Young Finns Study. *Circulation* 2004;**110**:2918–23. doi:10.1161/01.CIR.0000147540.88559.00
- 11 Kauppi M, Impivaara O, Mäki J, *et al.* Vitamin D status and common risk factors for bone fragility as determinants of quantitative ultrasound variables in a nationally representative population sample. *Bone* 2009;**45**:119–24. doi:10.1016/j.bone.2009.03.659

- 1  
2  
3 12 WHOCC - ATC/DDD Index. [http://www.whocc.no/atc\\_ddd\\_index/](http://www.whocc.no/atc_ddd_index/) (accessed 11 Sep2012).
- 4  
5 13 Carstensen B, Plummer M, Laara E, *et al.* *Epi: A package for statistical analysis in*  
6 *epidemiology*. 2008. <http://www.pubhealth.ku.dk/bxc/Epi/>
- 7  
8 14 Cole SR, Hernan MA. Constructing Inverse Probability Weights for Marginal Structural  
9 Models. *Am J Epidemiol* 2008;**168**:656–64. doi:10.1093/aje/kwn164
- 10  
11 15 Danaei G, Tavakkoli M, Hernán MA. Bias in Observational Studies of Prevalent Users:  
12 Lessons for Comparative Effectiveness Research From a Meta-Analysis of Statins. *Am J*  
13 *Epidemiol* 2012;**kwr301**. doi:10.1093/aje/kwr301
- 14  
15 16 Rahimi K, Bhala N, Kamphuisen P, *et al.* Effect of Statins on Venous Thromboembolic  
16 Events: A Meta-analysis of Published and Unpublished Evidence from Randomised  
17 Controlled Trials. *PLoS Med* 2012;**9**:e1001310. doi:10.1371/journal.pmed.1001310
- 18  
19 17 Ridker PM, Pradhan A, MacFadyen JG, *et al.* Cardiovascular benefits and diabetes risks of  
20 statin therapy in primary prevention: an analysis from the JUPITER trial. *The Lancet*  
21 **11**;**380**:565–71. doi:10.1016/S0140-6736(12)61190-8
- 22  
23 18 Westerbacka J, Yki-Järvinen H, Turpeinen A, *et al.* Inhibition of Platelet-Collagen  
24 Interaction An In Vivo Action of Insulin Abolished by Insulin Resistance in Obesity.  
25 *Arterioscler Thromb Vasc Biol* 2002;**22**:167–72. doi:10.1161/hq0102.101546
- 26  
27 19 Psaty BM, Siscovick DS. Minimizing Bias Due to Confounding by Indication in Comparative  
28 Effectiveness Research The Importance of Restriction. *JAMA* 2010;**304**:897–8.  
29 doi:10.1001/jama.2010.1205
- 30  
31 20 Prandoni P, Ghirarduzzi A, Prins MH, *et al.* Venous thromboembolism and the risk of  
32 subsequent symptomatic atherosclerosis. *Journal of Thrombosis and Haemostasis*  
33 2006;**4**:1891–6. doi:10.1111/j.1538-7836.2006.02058.x
- 34  
35 21 Prandoni P, Noventa F, Milan M. Aspirin and recurrent venous thromboembolism.  
36 *Phlebology* 2013;**28 Suppl 1**:99–104. doi:10.1177/0268355512475040
- 37  
38 22 Kemmeren JM, Algra A, Grobbee DE. Third generation oral contraceptives and risk of  
39 venous thrombosis: meta-analysis. *BMJ* 2001;**323**:131. doi:10.1136/bmj.323.7305.131
- 40  
41 23 Shufelt CL, Bairey Merz CN. Contraceptive Hormone Use and Cardiovascular Disease.  
42 *Journal of the American College of Cardiology* 2009;**53**:221–31.  
43 doi:10.1016/j.jacc.2008.09.042
- 44  
45 24 Casez P, Labarère J, Sevestre M-A, *et al.* ICD-10 hospital discharge diagnosis codes were  
46 sensitive for identifying pulmonary embolism but not deep vein thrombosis. *Journal of*  
47 *Clinical Epidemiology* 2010;**63**:790–7. doi:10.1016/j.jclinepi.2009.09.002
- 48  
49  
50  
51  
52  
53  
54  
55  
56  
57  
58  
59  
60

## Tables

Table 1 Baseline characteristics of study population

| Categorical variables and usage of drugs at baseline      |                                   |                |               |             |                |           |                |
|-----------------------------------------------------------|-----------------------------------|----------------|---------------|-------------|----------------|-----------|----------------|
| <b>Sex</b>                                                | male                              |                | 3589          | 45%         |                |           |                |
|                                                           | female                            |                | 4336          | 55%         |                |           |                |
| <b>Blood glucose lowering drug</b>                        | no                                |                | 7637          | 96%         |                |           |                |
|                                                           | yes                               |                | 288           | 4%          |                |           |                |
| <b>Insulin</b>                                            | no                                |                | 7787          | 98%         |                |           |                |
|                                                           | yes                               |                | 138           | 2%          |                |           |                |
| <b>Antithrombotic agent</b>                               | no                                |                | 7582          | 96%         |                |           |                |
|                                                           | yes                               |                | 343           | 4%          |                |           |                |
| <b>Antiplatelet agent</b>                                 | no                                |                | 7764          | 98%         |                |           |                |
|                                                           | yes                               |                | 161           | 2%          |                |           |                |
| <b>Vitamin K antagonists</b>                              | no                                |                | 7732          | 98%         |                |           |                |
|                                                           | yes                               |                | 193           | 2%          |                |           |                |
|                                                           |                                   |                |               |             |                |           |                |
|                                                           |                                   |                |               |             |                |           |                |
| Continuous variables at baseline LDL cholesterol (mmol/L) |                                   |                |               |             |                |           |                |
|                                                           |                                   | <b>1st Qu.</b> | <b>Median</b> | <b>Mean</b> | <b>3rd Qu.</b> | <b>SD</b> | <b>Missing</b> |
|                                                           | <b>Age</b>                        | 42.0           | 52.0          | 54.7        | 66.0           | 16.1      | 100            |
|                                                           | <b>Blood glucose (mmol/L)</b>     | 5.0            | 5.3           | 5.6         | 5.7            | 1.3       | 1275           |
|                                                           | <b>Total cholesterol (mmol/L)</b> | 5.1            | 5.9           | 5.9         | 6.6            | 1.1       | 1275           |
|                                                           | <b>HDL cholesterol (mmol/L)</b>   | 1.1            | 1.3           | 1.3         | 1.6            | 0.4       | 1275           |
|                                                           | <b>LDL cholesterol (mmol/L)</b>   | 3.1            | 3.8           | 3.8         | 4.5            | 1.2       | 1276           |
|                                                           | <b>Triglycerides (mmol/L)</b>     | 1.0            | 1.3           | 1.6         | 1.9            | 1.1       | 1275           |
|                                                           | <b>Ratio HDL/Chol</b>             | 18.0           | 22.0          | 23.0        | 28.0           | 7.4       | 1275           |
|                                                           | <b>CRP (mg/L)</b>                 | 0.3            | 0.8           | 2.3         | 2.0            | 6.3       | 1694           |
|                                                           | <b>Vitamin D3 (nmol/L)</b>        | 33.0           | 43.0          | 44.9        | 55.0           | 16.9      | 1825           |
|                                                           | <b>Homocysteine (µmol/L)</b>      | 9.2            | 11.0          | 12.0        | 13.5           | 5.1       | 1825           |
|                                                           | <b>Insulin (mU/L)</b>             | 5.0            | 7.0           | 9.6         | 11.0           | 30.3      | 1627           |

Table 2. Incidence of end-point events. RR (rate ratios) with 95% confidence intervals (CI) based on univariate Poisson regression model. Laboratory measurements in tertiles "[a,b]" means that interval a-b is closed left and open right. The data on variables are collected at baseline.

| Variable                           | P-years (1000) | Events | Incidence (1/1000) | 95% CI |       | RR    | 95% CI |       |
|------------------------------------|----------------|--------|--------------------|--------|-------|-------|--------|-------|
| <b>Current statin usage</b>        |                |        |                    |        |       |       |        |       |
| no                                 | 67.78          | 118    | 1.74               | 1.44   | 2.09  |       |        |       |
| yes                                | 11.17          | 18     | 1.61               | 0.95   | 2.55  | 0.93  | 0.56   | 1.52  |
| <b>Sex</b>                         |                |        |                    |        |       |       |        |       |
| male                               | 36.02          | 53     | 1.47               | 1.1    | 1.93  |       |        |       |
| female                             | 42.93          | 83     | 1.93               | 1.54   | 2.4   | 1.31  | 0.93   | 1.85  |
| <b>Age</b>                         |                |        |                    |        |       |       |        |       |
| (0,40]                             | 19.92          | 10     | 0.50               | 0.24   | 0.92  |       |        |       |
| (40,50]                            | 20.22          | 15     | 0.74               | 0.41   | 1.22  | 1.48  | 0.66   | 3.29  |
| (50,60]                            | 17.11          | 24     | 1.40               | 0.90   | 2.09  | 2.79  | 1.34   | 5.84  |
| (60,70]                            | 11.05          | 28     | 2.53               | 1.68   | 3.66  | 5.05  | 2.45   | 10.39 |
| (70,Inf]                           | 10.65          | 59     | 5.54               | 4.22   | 7.15  | 11.04 | 5.65   | 21.58 |
| <b>Insulin usage at baseline</b>   |                |        |                    |        |       |       |        |       |
| no                                 | 77.83          | 133    | 1.71               | 1.43   | 2.03  |       |        |       |
| yes                                | 1.12           | 3      | 2.68               | 0.55   | 7.83  | 1.57  | 0.50   | 4.92  |
| <b>Blood glucose lowering drug</b> |                |        |                    |        |       |       |        |       |
| no                                 | 76.71          | 124    | 1.62               | 1.34   | 1.93  |       |        |       |
| yes                                | 2.24           | 12     | 5.37               | 2.77   | 9.37  | 3.32  | 1.84   | 6.00  |
| <b>Antithrombotic agent usage</b>  |                |        |                    |        |       |       |        |       |
| no                                 | 76.7           | 120    | 1.56               | 1.30   | 1.87  |       |        |       |
| yes                                | 2.25           | 16     | 7.11               | 4.06   | 11.55 | 4.55  | 2.70   | 7.66  |
| <b>Antiplatelet agents usage</b>   |                |        |                    |        |       |       |        |       |
| no                                 | 77.87          | 126    | 1.62               | 1.35   | 1.93  |       |        |       |
| yes                                | 1.08           | 10     | 9.27               | 4.44   | 17.05 | 5.73  | 3.01   | 10.91 |
| <b>Vitamin K antagonists usage</b> |                |        |                    |        |       |       |        |       |
| no                                 | 77.7           | 128    | 1.65               | 1.37   | 1.96  |       |        |       |
| yes                                | 1.25           | 8      | 6.42               | 2.77   | 12.66 | 3.90  | 1.91   | 7.97  |
| <b>Blood glucose (mmol/L)</b>      |                |        |                    |        |       |       |        |       |
| [2.4,5.1]                          | 24.79          | 36     | 1.45               | 1.02   | 2.01  |       |        |       |
| (5.1,5.6]                          | 23.93          | 31     | 1.30               | 0.88   | 1.84  | 0.89  | 0.55   | 1.44  |
| (5.6,26.7]                         | 18.69          | 48     | 2.57               | 1.89   | 3.40  | 1.77  | 1.15   | 2.72  |
| <b>Total cholesterol (mmol/L)</b>  |                |        |                    |        |       |       |        |       |
| [1.9,5.4]                          | 23.71          | 36     | 1.52               | 1.06   | 2.10  |       |        |       |
| (5.4,6.3]                          | 21.33          | 33     | 1.55               | 1.06   | 1.02  | 0.64  | 1.63   | 1.02  |
| (6.3,11.7]                         | 22.38          | 46     | 2.06               | 1.50   | 1.35  | 0.88  | 2.09   | 1.35  |



|                                  |       |    |      |      |      |      |      |      |  |
|----------------------------------|-------|----|------|------|------|------|------|------|--|
| <b>HDL cholesterol (mmol/L)</b>  |       |    |      |      |      |      |      |      |  |
| [0.23,1.13]                      | 22.39 | 45 | 2.01 | 1.46 |      |      |      |      |  |
| (1.13,1.45]                      | 22.45 | 33 | 1.47 | 1.01 | 0.73 | 0.47 | 1.15 | 0.73 |  |
| (1.45,3.41]                      | 22.57 | 37 | 1.64 | 1.15 | 0.82 | 0.53 | 1.26 | 0.82 |  |
| <b>LDL cholesterol (mmol/L)</b>  |       |    |      |      |      |      |      |      |  |
| [0,3.3]                          | 22.56 | 34 | 1.51 | 1.04 |      |      |      |      |  |
| (3.3,4.2]                        | 22.79 | 38 | 1.67 | 1.18 | 1.11 | 0.70 | 1.76 | 1.11 |  |
| (4.2,8.8]                        | 22.06 | 43 | 1.95 | 1.41 | 1.29 | 0.82 | 2.03 | 1.29 |  |
| <b>Triglycerides (mmol/L)</b>    |       |    |      |      |      |      |      |      |  |
| [0.4,1.1]                        | 26.16 | 30 | 1.15 | 0.77 |      |      |      |      |  |
| (1.1,1.7]                        | 21.84 | 45 | 2.06 | 1.50 | 1.80 | 1.13 | 2.85 | 1.80 |  |
| (1.7,16.6]                       | 19.42 | 40 | 2.06 | 1.47 | 1.80 | 1.12 | 2.88 | 1.80 |  |
| <b>Ratio HDL/Chol</b>            |       |    |      |      |      |      |      |      |  |
| [3,19]                           | 23.92 | 48 | 2.01 | 1.48 |      |      |      |      |  |
| (19,25.7]                        | 20.58 | 34 | 1.65 | 1.14 | 0.82 | 0.53 | 1.28 | 0.82 |  |
| (25.7,56]                        | 22.91 | 33 | 1.44 | 0.99 | 0.72 | 0.46 | 1.12 | 0.72 |  |
| <b>C-reactive protein (mg/L)</b> |       |    |      |      |      |      |      |      |  |
| [0,0.39]                         | 22.26 | 22 | 0.99 | 0.62 |      |      |      |      |  |
| (0.39,1.41]                      | 21.62 | 42 | 1.94 | 1.40 | 1.97 | 1.17 | 3.29 | 1.97 |  |
| (1.41,191]                       | 20.53 | 40 | 1.95 | 1.39 | 1.97 | 1.17 | 3.32 | 1.97 |  |
| <b>Vitamin D3 (nmol/L)</b>       |       |    |      |      |      |      |      |      |  |
| [5,36]                           | 20.55 | 35 | 1.70 | 1.19 | 2.37 |      |      |      |  |
| (36,50]                          | 21.42 | 31 | 1.45 | 0.98 | 2.06 | 0.85 | 0.52 | 1.38 |  |
| (50,134]                         | 21.15 | 37 | 1.75 | 1.23 | 2.41 | 1.03 | 0.65 | 1.63 |  |
| <b>Homocysteine (µmol/L)</b>     |       |    |      |      |      |      |      |      |  |
| [3.7,9.7]                        | 22.15 | 18 | 0.81 | 0.48 | 1.29 |      |      |      |  |
| (9.7,12.5]                       | 21.82 | 32 | 1.47 | 1.00 | 2.07 | 1.80 | 1.01 | 3.22 |  |
| (12.5,111]                       | 19.16 | 53 | 2.77 | 2.07 | 3.62 | 3.40 | 1.99 | 5.81 |  |
| <b>Insulin (mU/L)</b>            |       |    |      |      |      |      |      |      |  |
| [1,5]                            | 22.72 | 26 | 1.14 | 0.75 | 1.68 |      |      |      |  |
| (5,9]                            | 22.67 | 45 | 1.99 | 1.45 | 2.66 | 1.73 | 1.07 | 2.81 |  |
| (9,2200]                         | 19.64 | 33 | 1.68 | 1.16 | 2.36 | 1.47 | 0.88 | 2.00 |  |

Table 3. Rate ratios (RR) with 95% confidence intervals (CI) of three Poisson regression models. Model I included only statin, age and sex as covariates. Models II and III included also Blood glucose lowering drug, Insulin usage, Vitamin K antagonists usage, and Antiplatelet agents usage as covariates. Inverse Probability Weights (IPW) Model III is based on stabilized weights for statin usage. In IPW model age and sex were in numerator, and age, sex, baseline oral antidiabetics, baseline insulin, and baseline anticoagulant usage were in denominator.

|                             |          | Model I     |      |       | Model II    |      |       | Model III        |      |       |
|-----------------------------|----------|-------------|------|-------|-------------|------|-------|------------------|------|-------|
|                             |          | RR (95% CI) |      |       | RR (95% CI) |      |       | RR, IPW (95% CI) |      |       |
| Statin                      | no       | (reference) |      |       | (reference) |      |       | (reference)      |      |       |
|                             | current  | <b>0.64</b> | 0.38 | 1.05  | <b>0.60</b> | 0.36 | 1.00  | <b>0.58</b>      | 0.35 | 0.96  |
| Age                         | under 40 | (reference) |      |       | (reference) |      |       | (reference)      |      |       |
|                             | (40,50]  | 1.52        | 0.68 | 3.38  | 1.51        | 0.68 | 3.37  | 1.53             | 0.68 | 3.43  |
|                             | (50,60]  | 2.99        | 1.42 | 6.26  | 2.91        | 1.39 | 6.10  | 3.20             | 1.53 | 6.70  |
|                             | (60,70]  | 5.66        | 2.73 | 11.75 | 5.31        | 2.55 | 11.05 | 5.36             | 2.55 | 11.24 |
|                             | (70,Inf] | 11.68       | 5.94 | 22.95 | 9.92        | 4.99 | 19.74 | 9.93             | 4.95 | 19.92 |
| Sex                         | male     | (reference) |      |       | (reference) |      |       | (reference)      |      |       |
|                             | female   | 1.02        | 0.72 | 1.45  | 1.02        | 0.72 | 1.46  | 0.99             | 0.70 | 1.41  |
| Blood glucose lowering drug | no       | (reference) |      |       | (reference) |      |       | (reference)      |      |       |
|                             | yes      | 1.89        | 0.98 | 3.63  | 1.63        | 0.86 | 3.11  | 1.63             | 0.86 | 3.11  |
| Insulin usage               | no       | (reference) |      |       | (reference) |      |       | (reference)      |      |       |
|                             | yes      | 0.72        | 0.21 | 2.45  | 0.72        | 0.25 | 2.13  | 0.72             | 0.25 | 2.13  |
| Vitamin K antagonists       | no       | (reference) |      |       | (reference) |      |       | (reference)      |      |       |
|                             | yes      | 1.46        | 0.69 | 3.07  | 1.38        | 0.68 | 2.80  | 1.38             | 0.68 | 2.80  |
| Antiplatelet agents         | no       | (reference) |      |       | (reference) |      |       | (reference)      |      |       |
|                             | yes      | 2.33        | 1.20 | 4.53  | 2.60        | 1.42 | 4.76  | 2.60             | 1.42 | 4.76  |

Table 4. Statin usage and sex, interaction model. Model included age, Blood glucose lowering drug, Insulin usage, Vitamin K antagonists usage, and Antiplatelet agents usage as covariates.

|                  | P-years | Events | Incidence (95% CI) |      |      | RR (95% CI) |      |      |
|------------------|---------|--------|--------------------|------|------|-------------|------|------|
| no statin/male   | 30.57   | 50     | 1.64               | 1.21 | 2.16 | (reference) |      |      |
| statin/male      | 5.45    | 3      | 0.55               | 0.11 | 1.61 | 0.20        | 0.06 | 0.65 |
| no statin/female | 37.21   | 68     | 1.83               | 1.42 | 2.32 | 0.87        | 0.60 | 1.27 |
| statin/female    | 5.72    | 15     | 2.62               | 1.47 | 4.33 | 0.75        | 0.41 | 1.38 |

1  
2  
3  
4  
5  
6  
7  
8  
9  
10  
11  
12  
13  
14  
15  
16  
17  
18  
19  
20  
21  
22  
23  
24  
25  
26  
27  
28  
29  
30  
31  
32  
33  
34  
35  
36  
37  
38  
39  
40  
41  
42  
43  
44  
45  
46  
47  
48  
49  
50  
51  
52  
53  
54  
55  
56  
57  
58  
59  
60

# Statin use associates with a reduced incidence of venous thromboembolism – A population-based cohort study

---

<sup>1</sup>Riitta LassilaMD, PhD, <sup>2</sup>Antti Jula, MD, PhD, <sup>3</sup> JannePitkaniemi, PhD,  
and <sup>3</sup>Jari Haukka, MD, PhD

<sup>1</sup>Coagulation Disorders Unit, Department of Medicine, Division of Hematology and Laboratory Services HUSLAB and Clinical Chemistry, Helsinki University Central Hospital, Helsinki, Finland

<sup>2</sup>The National Institute for Health and Welfare (THL), Finland

<sup>3</sup>Hjelt Institute, University of Helsinki, Finland

**Corresponding author:**

Jari Haukka  
University of Helsinki, Hjelt Institute  
PO Box 40, FI-00014 University of Helsinki, Finland  
email: [jari.haukka@helsinki.fi](mailto:jari.haukka@helsinki.fi)  
tel.: +358 50 4155314  
fax.: +358 09 191 27518

**Keywords:** venous thromboembolism, epidemiology, statins, cohort study

**Word count:** 2978

## Abstract

**Objectives:** Venous thromboembolism (VTE) continues to be a frequent, medical emergency demanding condition to reach the diagnosis and initiate anticoagulation therapy. The use of statins is reported, in addition to reducing the incidence of arterial thrombosis, also to decrease both the incidence and reoccurrence of VTE. The aim of our study **is was** to explore the association between statin usage and the incidence of new VTE at the population level during a 10-year follow-up.

Formatted: Highlight

**Design:** Population based historic cohort

**Setting:** The Health 2000 survey was based on a nationally representative sample.

**Participants:** 8028 individuals aged 30 years or over in Finland.

**Primary and secondary outcome measures:** The primary end-point event was the first ever hospitalization due to one of the following causes: pulmonary embolism (ICD10 I26), cerebral venous nonpyogenic thrombosis (I63.6), **and venous thrombosis phlebitis and thrombophlebitis of superficial vessels of lower extremities (I180.0-180.9189).**

Formatted: Highlight

Formatted: Highlight

Formatted: Highlight

**Results:** The preselected explanatory variables applied to Poisson regression model were statin usage (no/yes) during follow-up (2000-2011) and several baseline data (age, sex; usage of blood glucose lowering drug, vitamin K antagonists, and anti-platelet agents). We observed 136 VTE events, the incidence of 1.72 (95% CI 1.44-2.04) per 1000 person-years. Current statin usage did not associate with the incidence of VTE according to the univariate model (RR 0.93, 0.56-1.52), but when adjusted with baseline variables (age, sex, medications) the RR declined to 0.60 (0.36-1.00, p= 0.04).

**Conclusions:** Statin use offers protection against first ever VTE event and appears as a primary prevention tool in patients without anticoagulation or anti-platelet medication.

### Strengths of this study

- population based, no selection bias in start of follow-up
- long and complete follow-up information

### Limitations of this study

- limited number of background variables and incidence events
- the comprehensive use of prescribed drugs in this study, could not be verified with certainty

Formatted: Highlight

Formatted: Highlight

### Introduction

Venous thromboembolism (VTE) continues to be a frequent condition which demands medical emergency attention to reach the diagnosis and initiate anticoagulation therapy. The mortality during a few months after VTE varies between 5-20%, and the patients often have other co-morbidities, such as cardiovascular disease and cancer. The yearly incidence of VTE is 1-2/1000 inhabitants in western societies. Nowadays, the traditional heparin and vitamin K antagonist (VKA) therapy followed with the course of temporal (3-6 months) or permanent VKA can be opted with novel oral anticoagulants[1].

The decision of either continuing the anticoagulation for a few months or permanently depends on the acquired or inherited risk factor profile of the patient. This includes age above 60 years and concomitant illness, including cancer and inflammatory diseases as well as obesity, hormonal remedies and family history or severe thrombophilias (such as homozygosity of factor V Leiden or

1  
2  
3  
4  
5  
6  
7 prothrombin mutation, double defects, antiphospholipid antibody syndrome), subjecting the  
8 patient to recurrent VTE. Despite the clinical evaluation the recurrence rate of VTE continues to  
9 be 15-20% after an idiopathic event and around 5% after a provoked thrombosis[1]. Bleeding  
10 tendency needs to be regularly weighted also against the risk of thrombosis recurrence, while  
11 maintaining the anticoagulation.  
12  
13  
14  
15

16  
17  
18 The use of statins has been reported to reduce the incidence of not only the arterial thrombosis,  
19 but also interesting data on the decline of both the incidence and reoccurrence of VTE have  
20 emerged. Retrospective observational and case-control studies as well as experimental evidence  
21 refer to the possibility that statins exert an antithrombotic effect also in the venous system. A  
22 recent meta-analysis reported the association of VTE and a 20-36% protection with statin use-[2].  
23  
24  
25

26 | recent meta-analysis reported the association of VTE and a 20-36% protection with statin use-[2].  
27  
28 A primary prevention trial of VTE with rosuvastatin in a randomized placebo-controlled design  
29 showed a 48% reduction in the incidence of VTE[3]. Moreover, statin treatment alleviated the risk  
30 of recurrent pulmonary embolism by 50% whether the patient used long-term vitamin K  
31 antagonist treatment or had stopped anticoagulation, as reported by a Dutch population-based  
32 study with initially hospitalized patients[4]. Finally, statins decrease the occurrence of venous  
33 thromboembolism even in patients with cancer[5].  
34  
35  
36  
37  
38  
39  
40

Field Code Changed

41 Statins reduce the procoagulant activity of platelet membranes and downplay the signaling via LDL  
42 receptors, which are engaged with the platelet activation[6]. Statins also enhance fibrinolysis by  
43 reducing the plasminogen activator inhibitor-1 and triglyceride concentration. Also, other  
44 pleiotropic and anti-inflammatory mechanisms, including dampened tissue factor expression by  
45 monocytes, have been described which can attenuate the risk of thrombosis.  
46  
47  
48  
49  
50  
51  
52  
53  
54  
55  
56  
57  
58  
59  
60

1  
2  
3  
4  
5  
6  
7 The aim of the study **was** to explore the association between statin usage and incidence of the  
8 first ever VTE in Finland. Our study utilizes a nationally representative sample of 8028 persons  
9 aged >30 years [7] of The Health 2000 Survey and a prospective observational pharmaco-  
10 epidemiological design.  
11  
12  
13

Formatted: Highlight

## 14 15 16 17 **Material and methods**

### 18 19 20 21 **Study population**

22 The Health 2000 survey was based on a nationally representative sample of 8028  
23 individuals aged 30 years or over in Finland. To ensure that sample is representative of the  
24 Finnish population, a two-stage stratified cluster sampling procedure was used. The baseline  
25 data collection from study subjects took place between September 2000 and June 2001, and  
26 consisted of an interview and a comprehensive health examination. Of the study sample 6986  
27 subjects (87 %) were interviewed at their home or in an institution, 6354 subjects (79 %)  
28 took part in a comprehensive health examination and 416 subjects (5%) were examined at  
29 their home. The Health 2000 study was approved by the Ethics Committees of the National  
30 Public Health Institute (since 2009 the National Institute for Health and Welfare) and the  
31 Hospital District of Helsinki and Uusimaa, and the participants gave written informed  
32 consent[7].  
33  
34  
35  
36  
37  
38  
39  
40  
41  
42  
43

### 44 45 **Follow-up time and end-points**

46  
47 The primary end-point event of this study was the first hospitalization due one of the  
48 following causes: pulmonary embolism (ICD10 I26), cerebral infarction due to cerebral  
49 venous nonpyogenic thrombosis (I63.6), **phlebitis and thrombophlebitis of superficial**  
50 **vessels deep vein thrombosis, including thrombophlebitis of lower extremities (I480.0-180.9).**  
51  
52  
53  
54  
55  
56  
57  
58  
59  
60

Formatted: Highlight

Comment [LR1]: 189?

Formatted: Highlight

Formatted: Highlight

1  
2  
3  
4  
5  
6  
7 The information about end-points was obtained from National Hospital Discharge Register  
8 that covers all hospitalizations in Finland starting from 1969. The 10-year follow-up was  
9 started at the beginning of Health 2000 Study and was stopped at death, end of year 2011, or  
10 end-point, whichever occurred first. The data about deaths were obtained from the Statistics  
11 Finland. There were 103 individuals with recorder primary end-point before the start of  
12 follow-up compatible with the general prevalence of the disease, and these subjects were  
13 excluded from the study population. Thus, the size of study population in the start of follow-  
14 up was 7925.  
15  
16  
17  
18  
19  
20  
21  
22

### 23 **Laboratory measurements**

24  
25 Venous blood samples were drawn from the antecubital vein after a minimum of 4 h fasting.  
26  
27 HDL cholesterol, total cholesterol, triglyceride and plasma glucose concentrations were  
28 determined enzymatically (Roche Diagnostics, GmbH, Mannheim, Germany for HDL; Olympus  
29 System Reagent, Hamburg, Germany for total cholesterol, triglycerides and glucose) with a  
30 clinical chemistry analyser (Olympus, AU400, Hamburg, Germany)[8]. C-reactive protein  
31 (CRP) concentrations were determined by a chemiluminescent immunometric assay  
32 (Immulite, Diagnostic Products, Los Angeles, CA)[8]. LDL cholesterol was calculated with the  
33 Friedewald formula. Plasma insulin and homocysteine concentrations were determined with  
34 microparticle enzyme immunoassay (Abbott Laboratories, Dainabot, Tokyo, Japan)[9,10]. S-  
35 25(OH)D concentrations were measured by radioimmunoassay (Incstar, Stillwater, MN,  
36 USA)[11].  
37  
38  
39  
40  
41  
42  
43  
44  
45  
46  
47

### 48 **Drug information**

49  
50 The data about the prescribed and purchased drugs were obtained from registers of the Social  
51 Insurance Institution. We had records of the following drugs classified by Anatomical  
52 Therapeutic Chemical (ATC) code[12]: statins (C10AA), blood glucose lowering drugs,  
53  
54  
55  
56  
57  
58  
59  
60



1  
2  
3  
4  
5  
6  
7 excluding insulins (A10B), insulin (A10A), VKA (B01AA) , and antiplatelet agents, excluding  
8  
9 heparin (B01AC) and over the counter acetylsalicylic acid. Regarding statins the data included  
10  
11 all prescribed statins purchased during the follow-up period in 2000 – 2006 and 2008.  
12  
13 Because there were no data available regarding the drug amounts purchased for years 2007,  
14  
15 and 2009-2011, we calculated the mean amount of purchase based on available years and  
16  
17 adapted it for the whole follow-up period. Time dependent variable for the current statin  
18  
19 usage was determined for each individual with the prescription data using R language  
20  
21 package Epi[13]. The follow-up time of each individual with statin exposure was cut into 6-  
22  
23 month periods and the statin usage in each period was determined. For other drugs we had  
24  
25 only the number of prescriptions at the baseline year 2000, which was used to construct a  
26  
27 dichotomic variable of drug usage at baseline (no/yes).  
28  
29  
30  
31  
32

### 33 **Statistical modeling**

34  
35 We applied the Poisson regression model using end-point event as a dependent variable,  
36  
37 length of the follow-up as an offset variable, and statin usage (no/yes) during each time  
38  
39 period as time-varying explanatory variable. The following variables were used as time-  
40  
41 invariant variables measured at baseline: age (30-40, 40-50, 50-60, 60-70, over 70), sex  
42  
43 (male/female), blood glucose lowering drug usage, excluding insulins (no/yes), insulin usage  
44  
45 (no/yes), vitamin K antagonists usage (no/yes) , antiplatelet agents (no/yes) , blood glucose  
46  
47 (mmol/L), total cholesterol (mmol/L), HDL cholesterol (mmol/L), LDL cholesterol (mmol/L),  
48  
49 triglycerides (mmol/L), CRP (mg/L), vitamin D3 (nmol/L), homocysteine ( $\mu$ mol/L), and  
50  
51 insulin (mU/L). The values of the laboratory measurements were transformed to categorical  
52  
53 variables defined by tertiles. We also estimated the inverse probability weights (IPW) to fit  
54  
55 marginal structural models[14]. IPW were estimated using age and sex in the numerator, and  
56  
57  
58  
59  
60

1  
2  
3  
4  
5  
6  
7 age, sex, blood glucose lowering drugs other than insulin usage, VKA usage, and use of  
8  
9 antiplatelet agent in the denominator. [In order to check survivor bias we carried out](#)  
10 [modeling without subjects with prevalent statin use in start of follow-up \(N=460 excluded\)](#)  
11 [\[15\]](#).  
12  
13  
14

## 15 16 17 Results

18  
19 The size of the study population was 7925, including 3589 males and 4336 females (Table 1).  
20  
21 We observed 136 VTE events during the follow-up with the incidence of 1.72 (95% CI 1.44-  
22 2.04) per 1000 person-years during the mean follow-up time 10 years (Table 2). There were  
23  
24 64 events with the diagnosis pulmonary embolism (ICD-10 I26), one with sinus thrombosis  
25  
26 (I636) and 71 with deep vein thrombosis (~~1.80(1.80,0.0-1.80,0.9)~~).  
27  
28  
29  
30

31 All together there were 67,532 statin prescriptions, and 2083 individuals (26% of population)  
32  
33 had at least one prescription. Simvastatin (ATC code C10AA01) with 54% of prescriptions  
34  
35 and atorvastatin (C10AA05) with 23% represented the most frequent active lipid-lowering  
36  
37 substances. Current statin usage that comprised 14% of all cumulated person-years, did not  
38  
39 associate with the incidence of VTE according to the univariate model Rate Ratio (RR) 0.93  
40  
41 (0.56-1.52)(Table 2). The use of oral antidiabetic drugs at the baseline was associated with a  
42  
43 three-fold increased incidence (RR 3.32, 1.84-6.00), but insulin usage did not show any  
44  
45 association. Using any antithrombotic drugs associated with higher incidence (RR 4.55, 2.70-  
46  
47 7.66).  
48  
49

50 Addition of more explanatory variables in the model substantially altered the association  
51  
52 between the statin usage and incidence (Table 3). Adjusting for sex, age, baseline oral  
53  
54  
55  
56  
57  
58  
59  
60

Formatted: Highlight

Formatted: Highlight

Formatted: Highlight

1  
2  
3  
4  
5  
6  
7 antidiabetic, insulin, and use of antithrombotics (Model II) reduced the RR to 0.60 (0.36-1.00).  
8  
9 Using IPW for the structural model (Model III) decreased the RR further to 0.58 (0.35-0.96).  
10  
11 Adjusting for the baseline laboratory measurements also decreased slightly the estimate for  
12  
13 statin effect, e.g. adjusting for CRP gave RR 0.43 (0.23- 0.81). However, because of the missing  
14  
15 laboratory measurements we do not report these results in further detail, e.g. for CRP there  
16  
17 were several (1694) missing values. (Table 2). Increased levels of LDL associated with an  
18  
19 increasing incidence of VTE, the same occurred with homocysteine.

**Comment [LR2]:** Kannattaisiko tämä paljastaa jo metodeissa ja kertoo jotakin syistä kun jaamasivat noista muista puuttuvista datoista

20  
21  
22 In addition, we looked for the possible interactions between statin usage and age, sex, blood  
23  
24 glucose lowering drugs usage (excluding use of insulin), VKA and platelet aggregation  
25  
26 inhibitors. Interaction for sex and statin usage was significant ( $\chi^2=6.310$ ,  $df=1$ ,  $p=0.012$ ).  
27  
28 Interestingly, it turned out that the incidence of VTE among the statin group for males was  
29  
30 quite low (RR 0.22, 0.06-0.65), but for females such an association was not obvious (RR 0.75,  
31  
32 0.41-1.38), upon comparing the statin usage without its usage (Table 4.).

33  
34  
35  
36 [In sensitivity analyses without prevalent statin users there was 115 cases in non-statin group](#)  
37  
38 [and 10 cases in statin group: unadjusted RR was 0.82 \(0.43- 1.56\) and adjusted 0.63 \( 0.33-](#)  
39  
40 [1.21\).](#)

## 41 42 43 Discussion

44  
45 To our knowledge, this is the first report studying association between statin usage and VTE  
46  
47 that utilizes a nationally representative population sample. Our results during the 11 years of  
48  
49 prospective follow-up on the incidence of VTE are in line with the recent meta-  
50  
51 analysis[16][15], which showed the risk reduction of 0.89 (0.78-1.01) for VTE among statin  
52  
53 users. The JUPITER study, the largest meta-analysis of trials randomized trial, including 465  
54  
55  
56  
57  
58  
59  
60

**Formatted:** Highlight

1  
2  
3  
4  
5  
6  
7 events, showed 36% reduction in VTE (RR 0.64, 0.39–1.06, p=0.08)<sup>[3,16]</sup>. Our study  
8 addressed the new incidence of VTE, as the patients who previously had suffered from VTE  
9 (136/8028) were excluded from study population. The prospective nature and large  
10 population-based design of pharmaco-epidemiology are the strengths of our study.  
11  
12  
13  
14

Formatted: Highlight

15  
16  
17 In this freely living Finnish population sample we could demonstrate that statin use is  
18 associated with a reduction of the incidence of VTE, including both deep vein thrombosis of  
19 the lower extremities, pulmonary embolism and one case of cerebrovascular sinus  
20 thrombosis. This adds to the confirmation that statins exert anticoagulant activity<sup>[2–5]</sup>.  
21  
22  
23  
24 Furthermore, it supports the idea that statin therapy could be implemented to the patients  
25 with the risk of VTE.  
26  
27  
28  
29

30 We observed that use of oral antidiabetic drugs at the baseline was associated with a three-  
31 fold increased incidence (RR 3.32, 1.84–6.00), which refers to that insulin-resistant patients  
32 carry a high risk of VTE, and the oral antidiabetic drugs do not seem to alleviate this risk,  
33 while insulin may do so<sup>[18,17]</sup>. The positive association between antithrombotic drugs and  
34 VTE is quite probably due to confounding by indication<sup>[19,18]</sup>, and also the co-occurrence of  
35 cardiovascular disease and VTE has been noted in several studies<sup>[20,19]</sup>. The limitation of  
36 our study relies on the fact that over-the counter aspirin use is not controlled. This is  
37 significant, as aspirin has been recently shown to inhibit the reoccurrence of idiopathic  
38 VTE<sup>[21,20]</sup>.  
39  
40  
41  
42  
43  
44  
45  
46  
47  
48

49 Men seemed to respond to statin use more favourably than females, indicating a plausible  
50 hormonal regulation of the effect of statins. In women we did not control for hormonal  
51 replacement therapy, which may be a confounding remedy, known to be a risk factor for  
52  
53  
54  
55  
56  
57  
58  
59  
60

1  
2  
3  
4  
5  
6  
7 VTE<sup>[22,23]</sup><sup>[21,22]</sup> The well-known age-association in increasing the incidence of DVT and PE  
8  
9 was evidenced also among our patients. Also, the overall incidence of VTE in Finland is  
10  
11 compatible with what has been reported internationally. The protective association with  
12  
13 incidence of VTE among highest third tertile of HDL-LDL ratio, lowest homocysteine and CRP  
14  
15 support earlier results of these surrogate laboratory markers.

16  
17  
18 Several limitations must be kept in mind when evaluating results from any observational  
19  
20 study based on record linkage of drug information. Firstly, the comprehensive use of  
21  
22 prescribed drugs in this study, could not be verified with certainty, and may be subject to  
23  
24 misclassification. The prescription data do not contain information on drugs used in nursing  
25  
26 homes, therefore, the misclassification of exposure is more likely among the older patient  
27  
28 groups. Secondly, although model based adjustments using regression and IPW were applied,  
29  
30 it is always possible that residual confounding factors could influence the results. E.g. statin  
31  
32 usage may depend on variables that are not included in the statistical models; or the  
33  
34 statistical models used in the analysis do not properly adjust for the confounding factors. The  
35  
36 importance of adjusting for possible confounding effects is reflected by the large difference  
37  
38 between estimates obtained from the uni- and multivariate models. On the other hand, the  
39  
40 results based on **the** three models with different pattern of covariates and modeling technique  
41  
42 remained nearly unchanged regarding the effect of current statin usage (Table 3). This  
43  
44 compatibility increases the credibility of the results. **albeit the actual incidences are relatively**  
45  
46 **low in numbers due to the natural incidence of 1-2 cases/1000 inhabitants annually.** Also, the  
47  
48 hospital records that are nationally gathered may suffer from inconsistencies. Recently, these  
49  
50 were evaluated in a separate study which validated this form of data collection in PE, but not  
51  
52 in DVT<sup>[24]</sup><sup>[23]</sup>. Thirdly, analyses without prevalent statin showed attenuated, not significant

Formatted: Highlight

Formatted: Highlight

1  
2  
3  
4  
5  
6  
7 [effect, which may be due to lower effect and lower number of cases resulting wider](#)  
8 [confidence limits.](#)  
9

10  
11  
12  
13  
14  
15 In conclusion, statin use offers protection against first ever VTE event. The elevated LDL  
16 cholesterol, CRP and homocysteine, as reported earlier also associate with the risk of new  
17 VTE. Statins appears as a primary prevention tool in patients with a high risk of VTE, exerting  
18 its best effect in male population.  
19  
20  
21  
22  
23

#### 24 **Acknowledgement**

25  
26 This study was funded by University of Helsinki and The National Institute for Health and  
27 Welfare, Finland (THL).  
28  
29

30 RL, AJ and JP have no relevant disclosures to declare. JH has had previous research  
31 agreements with Janssen-Cilag, Novartis, Orion Pharma, Abbott, Novo Nordisk Farma, Pfizer,  
32 Sanofi-Aventis, Astellas, and Takeda.  
33  
34  
35  
36  
37  
38  
39  
40  
41  
42  
43  
44  
45  
46  
47  
48  
49  
50  
51  
52  
53  
54  
55  
56  
57  
58  
59  
60

## References

- 1 Kearon C, Akl EA, Comerota AJ, *et al.* Antithrombotic therapy for VTE disease: Antithrombotic Therapy and Prevention of Thrombosis, 9th ed: American College of Chest Physicians Evidence-Based Clinical Practice Guidelines. *Chest* 2012;**141**:e419S–94S. doi:10.1378/chest.11-2301
- 2 Squizzato A, Galli M, Romualdi E, *et al.* Statins, fibrates, and venous thromboembolism: a meta-analysis. *Eur Heart J* 2010;**31**:1248–56. doi:10.1093/eurheartj/ehp556
- 3 Glynn RJ, Danielson E, Fonseca FAH, *et al.* A Randomized Trial of Rosuvastatin in the Prevention of Venous Thromboembolism. *New England Journal of Medicine* 2009;**360**:1851–61. doi:10.1056/NEJMoa0900241
- 4 Biere-Rafi S, Hutten BA, Squizzato A, *et al.* Statin treatment and the risk of recurrent pulmonary embolism. *Eur Heart J* 2013;**34**:1800–6. doi:10.1093/eurheartj/eht046
- 5 Khemasuwan D, Divietro ML, Tangdhanakanond K, *et al.* Statins decrease the occurrence of venous thromboembolism in patients with cancer. *Am J Med* 2010;**123**:60–5. doi:10.1016/j.amjmed.2009.05.025
- 6 Akkerman JWN. From low-density lipoprotein to platelet activation. *Int J Biochem Cell Biol* 2008;**40**:2374–8. doi:10.1016/j.biocel.2008.04.002
- 7 Aromaa A, Koskinen S. Health and Functional Capacity in Finland. Baseline Results of the Health 2000 Health Examination Survey. Helsinki, Finland: 2004. <http://www.terveys2000.fi/julkaisut/baseline.pdf>
- 8 Heistaro S. Methodology report : Health 2000 survey. Helsinki, Finland: : Kansanterveyslaitos 2008. <http://lib.thl.fi:2345/http://lib.thl.fi:2345/lib4/?PBFORMTYPE=01002&TITLEID=49681&SQS=1:FIN:1::6:50::HTML&PL=0>
- 9 Luotola K, Pietilä A, Zeller T, *et al.* Associations between interleukin-1 (IL-1) gene variations or IL-1 receptor antagonist levels and the development of type 2 diabetes. *Journal of Internal Medicine* 2011;**269**:322–32. doi:10.1111/j.1365-2796.2010.02294.x
- 10 Juonala M, Viikari JSA, Laitinen T, *et al.* Interrelations Between Brachial Endothelial Function and Carotid Intima-Media Thickness in Young Adults The Cardiovascular Risk in Young Finns Study. *Circulation* 2004;**110**:2918–23. doi:10.1161/01.CIR.0000147540.88559.00
- 11 Kauppi M, Impivaara O, Mäki J, *et al.* Vitamin D status and common risk factors for bone fragility as determinants of quantitative ultrasound variables in a nationally representative population sample. *Bone* 2009;**45**:119–24. doi:10.1016/j.bone.2009.03.659

- 1  
2  
3  
4  
5  
6  
7 12 WHOCC - ATC/DDD Index. [http://www.whooc.no/atc\\_ddd\\_index/](http://www.whooc.no/atc_ddd_index/) (accessed 11 Sep2012).  
8  
9 13 Carstensen B, Plummer M, Laara E, *et al.* *Epi: A package for statistical analysis in*  
10 *epidemiology*. 2008. <http://www.pubhealth.ku.dk/bxc/Epi/>  
11  
12 14 Cole SR, Hernan MA. Constructing Inverse Probability Weights for Marginal Structural  
13 *Models*. *Am J Epidemiol* 2008;**168**:656–64. doi:10.1093/aje/kwn164  
14  
15 15 Danaei G, Tavakkoli M, Hernán MA. Bias in Observational Studies of Prevalent Users:  
16 *Lessons for Comparative Effectiveness Research From a Meta-Analysis of Statins*. *Am J*  
17 *Epidemiol* 2012;:kwr301. doi:10.1093/aje/kwr301  
18  
19 16 Rahimi K, Bhala N, Kamphuisen P, *et al.* Effect of Statins on Venous Thromboembolic  
20 *Events: A Meta-analysis of Published and Unpublished Evidence from Randomised*  
21 *Controlled Trials*. *PLoS Med* 2012;**9**:e1001310. doi:10.1371/journal.pmed.1001310  
22  
23 17 Ridker PM, Pradhan A, MacFadyen JG, *et al.* Cardiovascular benefits and diabetes risks of  
24 *statin therapy in primary prevention: an analysis from the JUPITER trial*. *The Lancet*  
25 **11**;380:565–71. doi:10.1016/S0140-6736(12)61190-8  
26  
27 18 Westerbacka J, Yki-Järvinen H, Turpeinen A, *et al.* Inhibition of Platelet-Collagen  
28 *Interaction An In Vivo Action of Insulin Abolished by Insulin Resistance in Obesity*.  
29 *Arterioscler Thromb Vasc Biol* 2002;**22**:167–72. doi:10.1161/hq0102.101546  
30  
31 19 Psaty BM, Siscovick DS. Minimizing Bias Due to Confounding by Indication in Comparative  
32 *Effectiveness Research The Importance of Restriction*. *JAMA* 2010;**304**:897–8.  
33 doi:10.1001/jama.2010.1205  
34  
35 20 Prandoni P, Ghirarduzzi A, Prins MH, *et al.* Venous thromboembolism and the risk of  
36 *subsequent symptomatic atherosclerosis*. *Journal of Thrombosis and Haemostasis*  
37 **2006**;4:1891–6. doi:10.1111/j.1538-7836.2006.02058.x  
38  
39 21 Prandoni P, Noventa F, Milan M. Aspirin and recurrent venous thromboembolism.  
40 *Phlebology* 2013;**28 Suppl 1**:99–104. doi:10.1177/0268355512475040  
41  
42 22 Kemmeren JM, Algra A, Grobbee DE. Third generation oral contraceptives and risk of  
43 *venous thrombosis: meta-analysis*. *BMJ* 2001;**323**:131. doi:10.1136/bmj.323.7305.131  
44  
45 23 Shufelt CL, Bairey Merz CN. Contraceptive Hormone Use and Cardiovascular Disease.  
46 *Journal of the American College of Cardiology* 2009;**53**:221–31.  
47 doi:10.1016/j.jacc.2008.09.042  
48  
49 24 Casez P, Labarère J, Sevestre M-A, *et al.* ICD-10 hospital discharge diagnosis codes were  
50 *sensitive for identifying pulmonary embolism but not deep vein thrombosis*. *Journal of*  
51 *Clinical Epidemiology* 2010;**63**:790–7. doi:10.1016/j.jclinepi.2009.09.002  
52  
53  
54  
55  
56  
57  
58  
59  
60



## Tables

Table 1 Baseline characteristics of study population

| Categorical variables and usage of drugs at baseline      |         |        |      |         |      |         |
|-----------------------------------------------------------|---------|--------|------|---------|------|---------|
| <b>Sex</b>                                                | male    |        | 3589 |         |      | 45%     |
|                                                           | female  |        | 4336 |         |      | 55%     |
| <b>Blood glucose lowering drug</b>                        | no      |        | 7637 |         |      | 96%     |
|                                                           | yes     |        | 288  |         |      | 4%      |
| <b>Insulin</b>                                            | no      |        | 7787 |         |      | 98%     |
|                                                           | yes     |        | 138  |         |      | 2%      |
| <b>Antithrombotic agent</b>                               | no      |        | 7582 |         |      | 96%     |
|                                                           | yes     |        | 343  |         |      | 4%      |
| <b>Antiplatelet agent</b>                                 | no      |        | 7764 |         |      | 98%     |
|                                                           | yes     |        | 161  |         |      | 2%      |
| <b>Vitamin K antagonists</b>                              | no      |        | 7732 |         |      | 98%     |
|                                                           | yes     |        | 193  |         |      | 2%      |
|                                                           |         |        |      |         |      |         |
|                                                           |         |        |      |         |      |         |
| Continuous variables at baseline LDL cholesterol (mmol/L) |         |        |      |         |      |         |
|                                                           | 1st Qu. | Median | Mean | 3rd Qu. | SD   | Missing |
| <b>Age</b>                                                | 42.0    | 52.0   | 54.7 | 66.0    | 16.1 | 100     |
| <b>Blood glucose (mmol/L)</b>                             | 5.0     | 5.3    | 5.6  | 5.7     | 1.3  | 1275    |
| <b>Total cholesterol (mmol/L)</b>                         | 5.1     | 5.9    | 5.9  | 6.6     | 1.1  | 1275    |
| <b>HDL cholesterol (mmol/L)</b>                           | 1.1     | 1.3    | 1.3  | 1.6     | 0.4  | 1275    |
| <b>LDL cholesterol (mmol/L)</b>                           | 3.1     | 3.8    | 3.8  | 4.5     | 1.2  | 1276    |
| <b>Triglycerides (mmol/L)</b>                             | 1.0     | 1.3    | 1.6  | 1.9     | 1.1  | 1275    |
| <b>Ratio HDL/Chol</b>                                     | 18.0    | 22.0   | 23.0 | 28.0    | 7.4  | 1275    |
| <b>CRP (mg/L)</b>                                         | 0.3     | 0.8    | 2.3  | 2.0     | 6.3  | 1694    |
| <b>Vitamin D3 (nmol/L)</b>                                | 33.0    | 43.0   | 44.9 | 55.0    | 16.9 | 1825    |
| <b>Homocysteine (µmol/L)</b>                              | 9.2     | 11.0   | 12.0 | 13.5    | 5.1  | 1825    |
| <b>Insulin (mU/L)</b>                                     | 5.0     | 7.0    | 9.6  | 11.0    | 30.3 | 1627    |

Table 2. Incidence of end-point events. RR (rate ratios) with 95% confidence intervals (CI) based on univariate Poisson regression model. Laboratory measurements in tertiles "[a,b]" means that interval a-b is closed left and open right. The data on variables are collected at baseline.

| Variable                           | P-years (1000) | Events | Incidence (1/1000) | 95% CI |       | RR    | 95% CI |       |
|------------------------------------|----------------|--------|--------------------|--------|-------|-------|--------|-------|
| <b>Current statin usage</b>        |                |        |                    |        |       |       |        |       |
| no                                 | 67.78          | 118    | 1.74               | 1.44   | 2.09  |       |        |       |
| yes                                | 11.17          | 18     | 1.61               | 0.95   | 2.55  | 0.93  | 0.56   | 1.52  |
| <b>Sex</b>                         |                |        |                    |        |       |       |        |       |
| male                               | 36.02          | 53     | 1.47               | 1.1    | 1.93  |       |        |       |
| female                             | 42.93          | 83     | 1.93               | 1.54   | 2.4   | 1.31  | 0.93   | 1.85  |
| <b>Age</b>                         |                |        |                    |        |       |       |        |       |
| (0,40]                             | 19.92          | 10     | 0.50               | 0.24   | 0.92  |       |        |       |
| (40,50]                            | 20.22          | 15     | 0.74               | 0.41   | 1.22  | 1.48  | 0.66   | 3.29  |
| (50,60]                            | 17.11          | 24     | 1.40               | 0.90   | 2.09  | 2.79  | 1.34   | 5.84  |
| (60,70]                            | 11.05          | 28     | 2.53               | 1.68   | 3.66  | 5.05  | 2.45   | 10.39 |
| (70,Inf]                           | 10.65          | 59     | 5.54               | 4.22   | 7.15  | 11.04 | 5.65   | 21.58 |
| <b>Insulin usage at baseline</b>   |                |        |                    |        |       |       |        |       |
| no                                 | 77.83          | 133    | 1.71               | 1.43   | 2.03  |       |        |       |
| yes                                | 1.12           | 3      | 2.68               | 0.55   | 7.83  | 1.57  | 0.50   | 4.92  |
| <b>Blood glucose lowering drug</b> |                |        |                    |        |       |       |        |       |
| no                                 | 76.71          | 124    | 1.62               | 1.34   | 1.93  |       |        |       |
| yes                                | 2.24           | 12     | 5.37               | 2.77   | 9.37  | 3.32  | 1.84   | 6.00  |
| <b>Antithrombotic agent usage</b>  |                |        |                    |        |       |       |        |       |
| no                                 | 76.7           | 120    | 1.56               | 1.30   | 1.87  |       |        |       |
| yes                                | 2.25           | 16     | 7.11               | 4.06   | 11.55 | 4.55  | 2.70   | 7.66  |
| <b>Antiplatelet agents usage</b>   |                |        |                    |        |       |       |        |       |
| no                                 | 77.87          | 126    | 1.62               | 1.35   | 1.93  |       |        |       |
| yes                                | 1.08           | 10     | 9.27               | 4.44   | 17.05 | 5.73  | 3.01   | 10.91 |
| <b>Vitamin K antagonists usage</b> |                |        |                    |        |       |       |        |       |
| no                                 | 77.7           | 128    | 1.65               | 1.37   | 1.96  |       |        |       |
| yes                                | 1.25           | 8      | 6.42               | 2.77   | 12.66 | 3.90  | 1.91   | 7.97  |
| <b>Blood glucose (mmol/L)</b>      |                |        |                    |        |       |       |        |       |
| [2.4,5.1]                          | 24.79          | 36     | 1.45               | 1.02   | 2.01  |       |        |       |
| (5.1,5.6]                          | 23.93          | 31     | 1.30               | 0.88   | 1.84  | 0.89  | 0.55   | 1.44  |
| (5.6,26.7]                         | 18.69          | 48     | 2.57               | 1.89   | 3.40  | 1.77  | 1.15   | 2.72  |
| <b>Total cholesterol (mmol/L)</b>  |                |        |                    |        |       |       |        |       |
| [1.9,5.4]                          | 23.71          | 36     | 1.52               | 1.06   | 2.10  |       |        |       |
| (5.4,6.3]                          | 21.33          | 33     | 1.55               | 1.06   | 1.02  | 0.64  | 1.63   | 1.02  |
| (6.3,11.7]                         | 22.38          | 46     | 2.06               | 1.50   | 1.35  | 0.88  | 2.09   | 1.35  |

|                                  |       |    |      |      |      |      |      |      |  |
|----------------------------------|-------|----|------|------|------|------|------|------|--|
| <b>HDL cholesterol (mmol/L)</b>  |       |    |      |      |      |      |      |      |  |
| [0.23,1.13]                      | 22.39 | 45 | 2.01 | 1.46 |      |      |      |      |  |
| (1.13,1.45]                      | 22.45 | 33 | 1.47 | 1.01 | 0.73 | 0.47 | 1.15 | 0.73 |  |
| (1.45,3.41]                      | 22.57 | 37 | 1.64 | 1.15 | 0.82 | 0.53 | 1.26 | 0.82 |  |
| <b>LDL cholesterol (mmol/L)</b>  |       |    |      |      |      |      |      |      |  |
| [0,3.3]                          | 22.56 | 34 | 1.51 | 1.04 |      |      |      |      |  |
| (3.3,4.2]                        | 22.79 | 38 | 1.67 | 1.18 | 1.11 | 0.70 | 1.76 | 1.11 |  |
| (4.2,8.8]                        | 22.06 | 43 | 1.95 | 1.41 | 1.29 | 0.82 | 2.03 | 1.29 |  |
| <b>Triglycerides (mmol/L)</b>    |       |    |      |      |      |      |      |      |  |
| [0.4,1.1]                        | 26.16 | 30 | 1.15 | 0.77 |      |      |      |      |  |
| (1.1,1.7]                        | 21.84 | 45 | 2.06 | 1.50 | 1.80 | 1.13 | 2.85 | 1.80 |  |
| (1.7,16.6]                       | 19.42 | 40 | 2.06 | 1.47 | 1.80 | 1.12 | 2.88 | 1.80 |  |
| <b>Ratio HDL/Chol</b>            |       |    |      |      |      |      |      |      |  |
| [3,19]                           | 23.92 | 48 | 2.01 | 1.48 |      |      |      |      |  |
| (19,25.7]                        | 20.58 | 34 | 1.65 | 1.14 | 0.82 | 0.53 | 1.28 | 0.82 |  |
| (25.7,56]                        | 22.91 | 33 | 1.44 | 0.99 | 0.72 | 0.46 | 1.12 | 0.72 |  |
| <b>C-reactive protein (mg/L)</b> |       |    |      |      |      |      |      |      |  |
| [0,0.39]                         | 22.26 | 22 | 0.99 | 0.62 |      |      |      |      |  |
| (0.39,1.41]                      | 21.62 | 42 | 1.94 | 1.40 | 1.97 | 1.17 | 3.29 | 1.97 |  |
| (1.41,191]                       | 20.53 | 40 | 1.95 | 1.39 | 1.97 | 1.17 | 3.32 | 1.97 |  |
| <b>Vitamin D3 (nmol/L)</b>       |       |    |      |      |      |      |      |      |  |
| [5,36]                           | 20.55 | 35 | 1.70 | 1.19 | 2.37 |      |      |      |  |
| (36,50]                          | 21.42 | 31 | 1.45 | 0.98 | 2.06 | 0.85 | 0.52 | 1.38 |  |
| (50,134]                         | 21.15 | 37 | 1.75 | 1.23 | 2.41 | 1.03 | 0.65 | 1.63 |  |
| <b>Homocysteine (µmol/L)</b>     |       |    |      |      |      |      |      |      |  |
| [3.7,9.7]                        | 22.15 | 18 | 0.81 | 0.48 | 1.29 |      |      |      |  |
| (9.7,12.5]                       | 21.82 | 32 | 1.47 | 1.00 | 2.07 | 1.80 | 1.01 | 3.22 |  |
| (12.5,111]                       | 19.16 | 53 | 2.77 | 2.07 | 3.62 | 3.40 | 1.99 | 5.81 |  |
| <b>Insulin (mU/L)</b>            |       |    |      |      |      |      |      |      |  |
| [1,5]                            | 22.72 | 26 | 1.14 | 0.75 | 1.68 |      |      |      |  |
| (5,9]                            | 22.67 | 45 | 1.99 | 1.45 | 2.66 | 1.73 | 1.07 | 2.81 |  |
| (9,2200]                         | 19.64 | 33 | 1.68 | 1.16 | 2.36 | 1.47 | 0.88 | 2.00 |  |

Table 3. Rate ratios (RR) with 95% confidence intervals (CI) of three Poisson regression models. Model I included only statin, age and sex as covariates. Models II and III included also Blood glucose lowering drug, Insulin usage, Vitamin K antagonists usage, and Antiplatelet agents usage as covariates. Inverse Probability Weights (IPW) Model III is based on stabilized weights for statin usage. In IPW model age and sex were in numerator, and age, sex, baseline oral antidiabetics, baseline insulin, and baseline anticoagulant usage were in denominator.

|                             |          | Model I     |      |       | Model II    |      |       | Model III        |      |       |
|-----------------------------|----------|-------------|------|-------|-------------|------|-------|------------------|------|-------|
|                             |          | RR (95% CI) |      |       | RR (95% CI) |      |       | RR, IPW (95% CI) |      |       |
| Statin                      | no       | (reference) |      |       | (reference) |      |       | (reference)      |      |       |
|                             | current  | <b>0.64</b> | 0.38 | 1.05  | <b>0.60</b> | 0.36 | 1.00  | <b>0.58</b>      | 0.35 | 0.96  |
| Age                         | under 40 | (reference) |      |       | (reference) |      |       | (reference)      |      |       |
|                             | (40,50]  | 1.52        | 0.68 | 3.38  | 1.51        | 0.68 | 3.37  | 1.53             | 0.68 | 3.43  |
|                             | (50,60]  | 2.99        | 1.42 | 6.26  | 2.91        | 1.39 | 6.10  | 3.20             | 1.53 | 6.70  |
|                             | (60,70]  | 5.66        | 2.73 | 11.75 | 5.31        | 2.55 | 11.05 | 5.36             | 2.55 | 11.24 |
|                             | (70,Inf] | 11.68       | 5.94 | 22.95 | 9.92        | 4.99 | 19.74 | 9.93             | 4.95 | 19.92 |
| Sex                         | male     | (reference) |      |       | (reference) |      |       | (reference)      |      |       |
|                             | female   | 1.02        | 0.72 | 1.45  | 1.02        | 0.72 | 1.46  | 0.99             | 0.70 | 1.41  |
| Blood glucose lowering drug | no       | (reference) |      |       | (reference) |      |       | (reference)      |      |       |
|                             | yes      |             |      |       | 1.89        | 0.98 | 3.63  | 1.63             | 0.86 | 3.11  |
| Insulin usage               | no       | (reference) |      |       | (reference) |      |       | (reference)      |      |       |
|                             | yes      |             |      |       | 0.72        | 0.21 | 2.45  | 0.72             | 0.25 | 2.13  |
| Vitamin K antagonists       | no       | (reference) |      |       | (reference) |      |       | (reference)      |      |       |
|                             | yes      |             |      |       | 1.46        | 0.69 | 3.07  | 1.38             | 0.68 | 2.80  |
| Antiplatelet agents         | no       | (reference) |      |       | (reference) |      |       | (reference)      |      |       |
|                             | yes      |             |      |       | 2.33        | 1.20 | 4.53  | 2.60             | 1.42 | 4.76  |

Table 4. Statin usage and sex, interaction model. Model included age, Blood glucose lowering drug, Insulin usage, Vitamin K antagonists usage, and Antiplatelet agents usage as covariates.

|                  | P-years | Events | Incidence (95% CI) |      |      | RR (95% CI) |      |      |
|------------------|---------|--------|--------------------|------|------|-------------|------|------|
| no statin/male   | 30.57   | 50     | 1.64               | 1.21 | 2.16 | (reference) |      |      |
| statin/male      | 5.45    | 3      | 0.55               | 0.11 | 1.61 | 0.20        | 0.06 | 0.65 |
| no statin/female | 37.21   | 68     | 1.83               | 1.42 | 2.32 | 0.87        | 0.60 | 1.27 |
| statin/female    | 5.72    | 15     | 2.62               | 1.47 | 4.33 | 0.75        | 0.41 | 1.38 |

STROBE Statement—Checklist of items that should be included in reports of *cohort studies*

|                              | Item No | Recommendation                                                                                                                                                                                                                                                                                                                                                 |
|------------------------------|---------|----------------------------------------------------------------------------------------------------------------------------------------------------------------------------------------------------------------------------------------------------------------------------------------------------------------------------------------------------------------|
| <b>Title and abstract</b>    | 1       | (a) Indicate the study's design with a commonly used term in the title or the abstract<br><b>Statin use associates with a reduced incidence of venous thromboembolism – A population-based cohort study</b><br>(b) Provide in the abstract an informative and balanced summary of what was done and what was found<br><b>Done</b>                              |
| <b>Introduction</b>          |         |                                                                                                                                                                                                                                                                                                                                                                |
| Background/rationale         | 2       | Explain the scientific background and rationale for the investigation being reported<br><b>Done</b>                                                                                                                                                                                                                                                            |
| Objectives                   | 3       | State specific objectives, including any prespecified hypotheses<br>Done                                                                                                                                                                                                                                                                                       |
| <b>Methods</b>               |         |                                                                                                                                                                                                                                                                                                                                                                |
| Study design                 | 4       | Present key elements of study design early in the paper<br>Done                                                                                                                                                                                                                                                                                                |
| Setting                      | 5       | Describe the setting, locations, and relevant dates, including periods of recruitment, exposure, follow-up, and data collection<br>Done                                                                                                                                                                                                                        |
| Participants                 | 6       | (a) Give the eligibility criteria, and the sources and methods of selection of participants. Describe methods of follow-up<br>Done<br><del>(b) For matched studies, give matching criteria and number of exposed and unexposed</del>                                                                                                                           |
| Variables                    | 7       | Clearly define all outcomes, exposures, predictors, potential confounders, and effect modifiers. Give diagnostic criteria, if applicable<br>Done                                                                                                                                                                                                               |
| Data sources/<br>measurement | 8*      | For each variable of interest, give sources of data and details of methods of assessment (measurement). Describe comparability of assessment methods if there is more than one group<br>Done                                                                                                                                                                   |
| Bias                         | 9       | Describe any efforts to address potential sources of bias<br>Done                                                                                                                                                                                                                                                                                              |
| Study size                   | 10      | Explain how the study size was arrived at<br>Done                                                                                                                                                                                                                                                                                                              |
| Quantitative variables       | 11      | Explain how quantitative variables were handled in the analyses. If applicable, describe which groupings were chosen and why<br>Done                                                                                                                                                                                                                           |
| Statistical methods          | 12      | (a) Describe all statistical methods, including those used to control for confounding<br>Done<br>(b) Describe any methods used to examine subgroups and interactions<br>Done<br>(c) Explain how missing data were addressed<br>Done<br>(d) If applicable, explain how loss to follow-up was addressed<br>Done<br>(e) Describe any sensitivity analyses<br>Done |

| <b>Results</b>           |     |                                                                                                                                                                                                                                                                                       |
|--------------------------|-----|---------------------------------------------------------------------------------------------------------------------------------------------------------------------------------------------------------------------------------------------------------------------------------------|
| Participants             | 13* | (a) Report numbers of individuals at each stage of study—eg numbers potentially eligible, examined for eligibility, confirmed eligible, included in the study, completing follow-up, and analysed<br><b>Done</b>                                                                      |
|                          |     | (b) Give reasons for non-participation at each stage<br><b>Done</b>                                                                                                                                                                                                                   |
|                          |     | (c) Consider use of a flow diagram<br>Not included, presented in previous papers                                                                                                                                                                                                      |
| Descriptive data         | 14* | (a) Give characteristics of study participants (eg demographic, clinical, social) and information on exposures and potential confounders<br><b>Done</b>                                                                                                                               |
|                          |     | (b) Indicate number of participants with missing data for each variable of interest<br><b>Done</b>                                                                                                                                                                                    |
|                          |     | (c) Summarise follow-up time (eg, average and total amount)<br><b>Done</b>                                                                                                                                                                                                            |
| Outcome data             | 15* | Report numbers of outcome events or summary measures over time                                                                                                                                                                                                                        |
| Main results             | 16  | (a) Give unadjusted estimates and, if applicable, confounder-adjusted estimates and their precision (eg, 95% confidence interval). Make clear which confounders were adjusted for and why they were included<br><b>Done, 95% Ci given, interaction test with p-value and X2 test.</b> |
|                          |     | (b) Report category boundaries when continuous variables were categorized<br><b>Done</b>                                                                                                                                                                                              |
|                          |     | (c) If relevant, consider translating estimates of relative risk into absolute risk for a meaningful time period<br>Not done because of brevity. Easy to do if needed with data in tables.                                                                                            |
| Other analyses           | 17  | Report other analyses done—eg analyses of subgroups and interactions, and sensitivity analyses<br><b>Done</b>                                                                                                                                                                         |
| <b>Discussion</b>        |     |                                                                                                                                                                                                                                                                                       |
| Key results              | 18  | Summarise key results with reference to study objectives<br><b>Done</b>                                                                                                                                                                                                               |
| Limitations              | 19  | Discuss limitations of the study, taking into account sources of potential bias or imprecision. Discuss both direction and magnitude of any potential bias<br><b>Done</b>                                                                                                             |
| Interpretation           | 20  | Give a cautious overall interpretation of results considering objectives, limitations, multiplicity of analyses, results from similar studies, and other relevant evidence<br><b>Done</b>                                                                                             |
| Generalisability         | 21  | Discuss the generalisability (external validity) of the study results<br><b>Done. This is population based study.</b>                                                                                                                                                                 |
| <b>Other information</b> |     |                                                                                                                                                                                                                                                                                       |
| Funding                  | 22  | Give the source of funding and the role of the funders for the present study and, if applicable, for the original study on which the present article is based<br>Details give, not extra funding.                                                                                     |

\*Give information separately for exposed and unexposed groups.

1 **Note:** An Explanation and Elaboration article discusses each checklist item and gives methodological background and  
2 published examples of transparent reporting. The STROBE checklist is best used in conjunction with this article (freely  
3 available on the Web sites of PLoS Medicine at <http://www.plosmedicine.org/>, Annals of Internal Medicine at  
4 <http://www.annals.org/>, and Epidemiology at <http://www.epidem.com/>). Information on the STROBE Initiative is  
5 available at <http://www.strobe-statement.org>.  
6  
7  
8  
9  
10  
11  
12  
13  
14  
15  
16  
17  
18  
19  
20  
21  
22  
23  
24  
25  
26  
27  
28  
29  
30  
31  
32  
33  
34  
35  
36  
37  
38  
39  
40  
41  
42  
43  
44  
45  
46  
47  
48  
49  
50  
51  
52  
53  
54  
55  
56  
57  
58  
59  
60

For peer review only
